# Supplementary material
Source: publisher figshare collection journal article supplement (https://gsajournals.figshare.com/articles/dataset/_/8427110)
Supplement: Supplementary file 1 [file 1]

**B**

| Species                       | Black Bar Value | White Bar Value |
|-------------------------------|-----------------|-----------------|
| sapiens                       | 0               | 0               |
| Gallus gallus                 | 2               | 0               |
| Zebra Finch                   | 1               | 1               |
| Anolis carolinensis           | 2               | 1               |
| Xenopus tropicalis            | 4               | 1               |
| Danio rerio                   | 18              | 11              |
| Fugu rubripes                 | 16              | 8               |
| Elephant shark                | 4               | 1               |
| Lamprey                       | 9               | 1               |
| Ciona intestinalis            | 0               | 0               |
| Oikopleura dioica             | 1               | 0               |
| Branchiostoma floridae        | 8               | 4               |
| Saccoglossus kowalevskii      | 4               | 1               |
| Strongylocentrotus purpuratus | 3               | 1               |
| Lottia gigantea               | 3               | 0               |
| Capitella teleta              | 6               | 0               |
| Caenorhabditis elegans        | 3               | 0               |
| Drosophila melanogaster       | 5               | 0               |
| Nematostella vectensis        | 5               | 0               |
| Hydra vulgaris                | 3               | 2               |
| Trichoplax adhaerens          | 0               | 1               |
| Amphimedon queenslandica      | 5               | 0               |
| Oscarella carmela             | 3               | 1               |
| Xestosporgia testudinaria     | 5               | 3               |
| Stylissa carteri 24925        | 3               | 2               |
| Mnemiopsis leidyi             | 1               | 0               |
| Pleurobrachia bachei          | 0               | 1               |
| Salpingoeca rosetta           | 27              | 9               |
| Monosiga Brevicollis          | 14              | 1               |
| Dictyostelium discoideum      | 0               | 0               |

- IRS domain-containing duplicated or novel proteins

Figure S1
