# Supplementary material
Source: publisher figshare collection journal article supplement (https://gsajournals.figshare.com/articles/dataset/_/8427110)
Supplement: Supplementary file 1 [file 1]

## Sheet: Homo sapiens
Human PTB Domain Containing Proteins
E-value	score	bias	E-value	score	bias	exp	N	Sequence	Domains	Gene	Description
------- ------ -----	------- ------ -----	---- --	--------	-------	--------	-------------------------
2.1e-86	280.1	0.2	1.9e-43	139.3	0	2.2	2	gi|260593729|ref|NP_004298.1|	WW-PTB-PTB	APBB2	amyloid beta A4 precursor protein-binding family B member 2
5.2e-79	255.9	0.2	2.1e-40	129.4	0	2.1	2	gi|4502131|ref|NP_001155.1|	WW-PTB-PTB	APBB1	amyloid beta A4 precursor protein-binding family B member 1
3.5e-72	233.5	0.1	2.8e-38	122.4	0.1	2.1	2	gi|95147542|ref|NP_573420.2|	WW-PTB-PTB	APBB3	amyloid beta A4 precursor protein-binding family B member 3
3.6e-70	226.9	0.6	2.6e-32	102.9	0.7	3.4	3	gi|114688046|ref|NP_055647.2|	PTB-PTB-TBC	TBC1D4	TBC1 domain family member 4
8.7e-47	150.3	0.1	1.3e-46	149.7	0.1	1.3	1	gi|132626790|ref|NP_056442.2|	PTB	LDLRAP1	low density lipoprotein receptor adapter protein 1
1.6e-46	149.5	1.8	2.1e-46	149	1.8	1.2	1	gi|4885433|ref|NP_005447.1|	SH3-PTB	MAPK8IP1	C-Jun-amino-terminal kinase-interacting protein 1
2.7e-46	148.7	0.4	3.6e-46	148.3	0.4	1.1	1	gi|7705318|ref|NP_057399.1|	PTB	GULP1	PTB domain-containing engulfment adapter protein 1
4.6e-46	147.9	0.2	8.6e-46	147	0.2	1.5	1	gi|140161500|ref|NP_056060.2|	ANK-SAM-SAM-PTB	ANKS1A	ankyrin repeat and SAM domain-containing protein 1A
5.8e-46	147.6	1.2	1.9e-31	100	0.3	3.2	3	gi|50658061|ref|NP_055988.2|	PTB-PTB-TBC	TBC1D1	TBC1 domain family member 1
1.2e-44	143.2	1.3	1.6e-43	139.6	1.3	2.1	1	gi|224586793|ref|NP_058544.3|	PTB-SH2	SHC3	SHC-transforming protein 3
2.2e-44	142.4	0.9	3.3e-44	141.8	0.9	1.3	1	gi|31317301|ref|NP_055512.1|	PTB	NOS1AP	carboxyl-terminal PDZ ligand of neuronal nitric oxide synthase
4.7e-43	138	1.4	6.3e-43	137.6	1.4	1.2	1	gi|6912492|ref|NP_036456.1|	SH3-PTB	MAPK8IP2	C-Jun-amino-terminal kinase-interacting protein 2
3.9e-42	135.1	0.5	6.2e-42	134.4	0.5	1.3	1	gi|50511945|ref|NP_690001.3|	ANK-SAM-SAM-PTB	ANKS1B	ankyrin repeat and sterile alpha motif domain-containing protein 1B
1.3e-41	133.3	0.6	1.8e-41	132.9	0.6	1.2	1	gi|10863899|ref|NP_004747.1|	PTB-NUMBF	NUMBL	numb-like protein
5.1e-41	131.4	1.4	7.9e-41	130.8	1.4	1.3	1	gi|54144625|ref|NP_001005743.1|	PTB-NUMBF	NUMB	protein numb homolog
6.8e-40	127.7	0.7	3.8e-39	125.3	0.7	1.9	1	gi|169790811|ref|NP_036567.2|	PTB-SH2	SHC2	SHC-transforming protein 2
1.6e-39	126.5	0.1	3.2e-39	125.5	0.1	1.5	1	gi|222446609|ref|NP_976224.3|	PTB-SH2	SHC4	SHC-transforming protein 4
1.2e-38	123.7	0	1.6e-38	123.2	0	1.2	1	gi|33350928|ref|NP_066566.3|	PTB	DAB1	disabled homolog 1
6.6e-36	114.6	0	9.2e-36	114.2	0	1.2	1	gi|38787941|ref|NP_056134.2|	C1-PTENC2-SH2-PTB	TNS2	tensin-like C1 domain-containing phosphatase
9.3e-36	114.1	0	1.4e-35	113.6	0	1.3	1	gi|66529407|ref|NP_072174.3|	PTENc2-SH2-PTB	TNS1	tensin-1
5.6e-35	111.6	0.2	1.6e-34	110.1	0.2	1.7	1	gi|194239662|ref|NP_892113.4|	PTB-SH2	SHC1	SHC-transforming protein 1
9.6e-35	110.8	0.1	1.4e-34	110.3	0.1	1.3	1	gi|38327601|ref|NP_937872.1|	PDZ-PTB-RGS-RBD-RBD	RGS12	regulator of G-protein signaling 12
1.7e-34	110	0	2.4e-34	109.5	0	1.2	1	gi|11342678|ref|NP_004877.1|	PTB-PDZ-PDZ	APBA3	amyloid beta A4 precursor protein-binding family A member 3
3.2e-34	109.1	0.5	4.5e-34	108.6	0	1.5	2	gi|56682953|ref|NP_004438.3|	PTB-SH3	EPS8	epidermal growth factor receptor kinase substrate 8
8.3e-34	107.8	0	1.3e-33	107.1	0	1.3	1	gi|22035548|ref|NP_001154.2|	PTB-PDZ-PDZ	APBA1	amyloid beta A4 precursor protein-binding family A member 1
2.7e-33	106.1	0.1	3.9e-33	105.6	0.1	1.3	1	gi|164519084|ref|NP_036329.3|	PTB-TBC	RABGAP1	rab GTPase-activating protein 1
1.6e-31	100.3	0.1	2.2e-31	99.8	0.1	1.2	1	gi|22035550|ref|NP_005494.2|	PTB-PDZ-PDZ	APBA2	amyloid beta A4 precursor protein-binding family A member 2
3.1e-31	99.3	0.1	4.5e-31	98.8	0.1	1.3	1	gi|65288071|ref|NP_073585.8|	PTENC2-SH2-PTB	TNS3	tensin-3
8.3e-31	97.9	0	1.3e-30	97.3	0	1.3	1	gi|148491082|ref|NP_001334.2|	PTB	DAB2	disabled homolog 2
6.9e-27	85.1	0	8.4e-27	84.8	0	1.1	1	gi|4758578|ref|NP_004754.1|	PTB	ITGB1BP1	integrin beta-1-binding protein 1
5.2e-25	78.9	0.8	1.5e-24	77.5	0.4	1.8	2	gi|78217386|ref|NP_055672.3|	PTB-TBC	RABGAP1L	rab GTPase-activating protein 1-like
4.7e-17	52.9	0	7.9e-17	52.1	0	1.3	1	gi|157738639|ref|NP_116254.4|	SH2-PTB	TNS4	tensin-4 precursor
1.3e-16	51.4	0	1.9e-16	50.9	0	1.3	1	gi|31377557|ref|NP_710157.2|	PTB	FAM43A	protein FAM43A
1.5e-16	51.2	0	3.9e-16	49.9	0	1.6	1	gi|46409306|ref|NP_997217.1|	PTB	FAM43B	protein FAM43B
2.7e-16	50.3	0	4.9e-16	49.5	0	1.3	1	gi|21264616|ref|NP_073609.2|	PTB-SH3	EPS8L2	epidermal growth factor receptor kinase substrate 8-like protein 2
4.3e-15	46.4	0	7.4e-15	45.7	0	1.4	1	gi|24586663|ref|NP_060641.2|	BAR-PH-PTB	APPL2	DCC-interacting protein 13-beta
3.8e-13	40.1	0.2	7.2e-13	39.1	0.2	1.5	1	gi|6912242|ref|NP_036228.1|	BAR-PH-PTB	APPL1	DCC-interacting protein 13-alpha
5.3e-13	39.6	2.1	4.8e-12	36.4	0.6	2.1	2	gi|40255260|ref|NP_060403.3|	PTB	PID1	PTB-containing, cubilin and LRP1-interacting protein
2.1e-12	37.6	0	3.2e-12	37	0	1.2	1	gi|156938287|ref|NP_001096631.1|	PTB-SH2	SH2D5	SH2 domain-containing protein 5
2.5e-11	34.1	0	4.6e-11	33.2	0	1.4	1	gi|148539853|ref|NP_573441.2|	PTB-SH3	EPS8L1	epidermal growth factor receptor kinase substrate 8-like protein 1
1.3e-07	21.9	0.4	1.9e-06	18.1	0.4	2.2	1	gi|71067341|ref|NP_001025006.1|	PTB-CCM2	CCM2	malcavernin cerebral cavernous malformations 2
5.5e-05	13.3	0	0.00012	12.2	0	1.5	2	gi|31542255|ref|NP_542192.2|	PTB	CCM2L	cerebral cavernous malformations 2 protein-like
0.0004	10.5	0	0.00061	9.9	0	1.3	1	gi|21071018|ref|NP_620641.1|	PTB-SH3	EPS8L3	epidermal growth factor receptor kinase substrate 8-like protein 3
Human IRS Domain Containing Proteins
E-value	score	bias	E-value	score	bias	exp	N	Sequence	Domains	Gene	Description
------- ------ -----	------- ------ -----	---- --	--------	-----------	------	-----------
2e-35	123	0.1	3.2e-35	122.4	0.1	1.3	1	gi|4503357|ref|NP_001372.1|	PH-IRS	DOK1	docking protein 1
1.7e-31	110.5	0	2.8e-31	109.8	0	1.4	1	gi|41406050|ref|NP_003965.2|	PH-IRS	DOK2	docking protein 2
1.4e-30	107.5	0	2.8e-30	106.5	0	1.5	1	gi|38683860|ref|NP_003740.2|	PH-IRS	IRS2	insulin receptor substrate 2
1.5e-30	107.4	0	2.7e-30	106.6	0	1.4	1	gi|5031805|ref|NP_005535.1|	PH-IRS	IRS1	insulin receptor substrate 1
1.8e-29	103.9	0	3.6e-29	103	0	1.5	1	gi|221554537|ref|NP_079148.2|	PH-IRS	DOK3	docking protein 3
2.3e-29	103.6	0	4.1e-29	102.8	0	1.4	1	gi|20070302|ref|NP_060580.2|	PH-IRS	DOK4	docking protein 4
2.8e-29	103.3	0	5.2e-29	102.5	0	1.4	1	gi|47575849|ref|NP_689934.2|	PH-IRS	DOK6	docking protein 6
2e-28	100.6	0.1	4.2e-28	99.5	0.1	1.6	1	gi|4504733|ref|NP_003595.1|	PH-IRS	IRS4	insulin receptor substrate 4
3.4e-28	99.9	0	6.4e-28	99	0	1.4	1	gi|29544726|ref|NP_060901.2|	PH-IRS	DOK5	docking protein 5
9.9e-26	91.9	0.1	1.8e-25	91.1	0.1	1.3	1	gi|5730059|ref|NP_006644.1|	IRS	FRS3	fibroblast growth factor receptor substrate 3
4.4e-24	86.6	0.1	1.1e-23	85.4	0.1	1.6	1	gi|110347408|ref|NP_006645.3|	IRS	FRS2	fibroblast growth factor receptor substrate 2
1.2e-07	34	0	3.2e-07	32.5	0	1.7	1	gi|111185957|ref|NP_775931.3|	PH-IRS	DOK7	docking protein 7
0.0016	20.7	0	0.004	19.4	0	1.7	1	gi|223029410|ref|NP_006280.3|	B41-IRS-ILWEQ	TLN1	talin-1
0.0029	19.9	0	0.0072	18.6	0	1.7	1	gi|156938343|ref|NP_055874.2|	B41-IRS-ILWEQ	TLN2	talin-2

## Sheet: Gallus gallus
Chicken PTB Domain Containing Proteins
E-value	score	bias	E-value	score	bias	exp	N	Sequence	Domain composition	Vertebrate/Human Homolog
------- ------ -----	------- ------ -----	---- --	--------	-----------	-----------
4.5e-81	271.5	0.2	4.4e-40	137.1	0	2.4	2	gi|513184447|ref|XP_004936156.1|	WW-PTB-PTB	APBB2
6.6e-73	244.7	0.4	9.4e-37	126.2	0	2.1	2	gi|971378933|ref|XP_015136418.1|	WW-PTB-PTB	APBB1
1.6e-62	210.6	0	3.3e-28	98.2	1	3.2	3	gi|971377728|ref|XP_015132528.1|	PTB-TBC	TBC1D4
3.8e-57	193.1	0	4.6e-32	110.8	0.2	2.4	2	gi|971417282|ref|XP_015149042.1|	WW-PTB-PTB	APBB3
3e-44	150.8	0.2	4.5e-44	150.2	0.2	1.2	1	gi|513192695|ref|XP_004942469.1|	PTB	GULP1
3.2e-43	147.4	0.2	4.7e-43	146.9	0.2	1.2	1	gi|513225110|ref|XP_004935094.1|	ANK-SAM-SAM-PTB	ANKS1A
8.5e-43	146	2.8	4.9e-28	97.7	0.9	3.2	3	gi|389616152|ref|NP_001254502.1|	PTB-TBC	TBC1D1
1.3e-42	145.4	1.7	1.8e-42	145	1.7	1.2	1	gi|971398835|ref|XP_421126.5|	SH3-PTB	MAPK8IP1
1e-41	142.5	0.7	1.6e-41	141.8	0.7	1.3	1	gi|513196090|ref|XP_004943207.1|	PTB	NOS1AP
2.5e-40	137.9	0.3	4e-40	137.3	0.3	1.3	1	gi|971371704|ref|XP_015140183.1|	ANK-SAM-SAM-PTB	ANKS1B
2.9e-40	137.7	1.7	4.1e-40	137.2	1.7	1.2	1	gi|971423944|ref|XP_015135322.1|	PTB	NOS1APL
6.8e-40	136.5	0.3	1.2e-25	89.8	0.1	2.4	2	gi|513231139|ref|XP_004949302.1|	PTB-SH2	SHC3
1.2e-38	132.4	0	2.5e-38	131.4	0	1.6	1	gi|971413016|ref|XP_424123.5|	PTB-SH2	SHC4
2.9e-38	131.1	0	3.7e-38	130.8	0	1.1	1	gi|971430750|ref|XP_015153218.1|	PTB	LDLRAP1
1.5e-37	128.9	0.7	2.2e-37	128.3	0.7	1.2	1	gi|971398169|ref|XP_015142420.1|	PTB-NUMBF	NUMB
5.3e-35	120.5	1.4	7.9e-35	119.9	1.4	1.3	1	gi|971450863|ref|XP_015130064.1|	SH3-PTB	MAPK8IP2
2.4e-34	118.3	0.1	3.9e-34	117.6	0.1	1.3	1	gi|971408560|ref|XP_015146404.1|	PTB	DAB1
4.5e-33	114.2	0.1	1.1e-32	112.8	0.1	1.7	1	gi|647569326|ref|NP_001280209.1|	PTB-SH2	SHC1
8.3e-33	113.3	0.8	4.8e-32	110.8	0.8	2.1	1	gi|971436325|ref|XP_015155491.1|	PTB-SH2	SHC2
3.6e-32	111.2	0	5.4e-32	110.6	0	1.3	1	gi|513226605|ref|XP_418188.3|	PDZ-PDZ-PTB	APBA3
2.8e-31	108.3	0	4.1e-31	107.7	0	1.3	1	gi|45382041|ref|NP_990786.1|	PTEN_C2-SH2-PTB	TNS1
4e-31	107.8	0	6.2e-31	107.1	0	1.3	1	gi|118104070|ref|XP_424829.2|	PTB-PDZ-PDZ	APBA1
2.3e-30	105.3	0	3.8e-30	104.6	0	1.3	1	gi|971381977|ref|XP_015131337.1|	C1-PTEN_C2-SH2-PTB	TNS3
6.9e-30	103.7	0.4	1e-29	103.1	0.4	1.3	1	gi|118099497|ref|XP_415391.2|	PTB-TBC	RABGAP1
7.5e-30	103.6	0	1.1e-29	103.1	0	1.3	1	gi|971438234|ref|XP_015133023.1|	PTB	DAB2
4.3e-29	101.1	0.1	6e-29	100.6	0.1	1.2	1	gi|118095658|ref|XP_413771.2|	PDZ-PDZ-PTB	APBA2
2.4e-28	98.7	0.2	4.1e-28	97.9	0.2	1.4	1	gi|971395758|ref|XP_420820.4|	PDZ-PTB-RGS-RBD-RBD	RGS12
3.8e-25	88.2	0.1	7.1e-25	87.3	0.1	1.5	1	gi|363728012|ref|XP_416405.3|	PTB-SH3	EPS8
1.5e-24	86.2	0.4	1.8e-23	82.7	0.1	2.2	2	gi|971407007|ref|XP_015145786.1|	PTB-TBC	RABGAP1L
2e-22	79.3	0	5.4e-22	77.8	0	1.7	2	gi|971448566|ref|XP_015129138.1|	PTEN_C2-SH2-PTB	TNS2
4.6e-22	78.1	0	6.1e-22	77.7	0	1.1	1	gi|489406519|ref|NP_001264963.1|	PTB	ITGB1BP1
1.4e-17	63.4	0	2.2e-17	62.8	0	1.2	1	gi|971435539|ref|XP_015155140.1|	SH2-PTB	TNS4
1.2e-15	57.1	0	1.6e-15	56.6	0	1.2	1	gi|118095108|ref|XP_426700.2|	PTB	FAM43A
2.1e-14	53	0.1	4.6e-14	51.9	0.1	1.5	1	gi|513220037|ref|XP_004947545.1|	PTB	FAM43B
3.3e-13	49.1	0.1	6.7e-13	48.1	0.1	1.4	1	gi|971396764|ref|XP_015141770.1|	PTB-SH3	EPS8L2
3.5e-12	45.7	0.1	6.3e-12	44.9	0.1	1.5	1	gi|971416859|ref|XP_004944641.2|	BAR-PH-PTB	APPL1
7.3e-11	41.4	1.8	4.7e-10	38.7	0.5	2	2	gi|296011040|ref|NP_001171615.1|	PTB	PID1
1.8e-10	40.1	0	3.1e-10	39.3	0	1.3	1	gi|363728064|ref|XP_003640457.1|	BAR-PH-PTB	APPL2
5.8e-08	31.9	0.1	1.1e-07	31	0.1	1.4	1	gi|971429732|ref|XP_015152768.1|	PTB-SH2	SH2D5
2.8e-05	23.1	0.1	0.00029	19.8	0	2.1	2	gi|308199492|ref|NP_001184073.1|	PTB-CCM2	CCM2
0.0016	17.3	0.1	0.0027	16.6	0.1	1.3	1	gi|971424560|ref|XP_015150825.1|	RUN-PDZ-PTB	NOVEL NOT HUMAN
---- inclusion threshold ------
0.013	14.3	0	0.026	13.3	0	1.4	1	gi|363741526|ref|XP_003642516.1|	PTB-CCM2	CCM2L
Chicken IRS Domain Containing Proteins
E-value	score	bias	E-value	score	bias	exp	N	Sequence	Domain composition	Vertebrate/Human Homolog
------- ------ -----	------- ------ -----	---- --	--------		-----------	-----------
1.1e-35	121.7	0.1	1.8e-35	121	0.1	1.3	1	gi|971442658|ref|XP_015156788.1|	PH-IRS	DOK1
6.7e-33	112.8	0.5	1.1e-32	112	0.5	1.4	1	gi|971430112|ref|XP_003642597.3|	PH-IRS	DOK2
1.4e-31	108.6	0	2.6e-31	107.7	0	1.5	1	gi|971392306|ref|XP_003641132.3|	PH-IRS	IRS4
9.8e-31	105.8	0	1.6e-30	105.2	0	1.3	1	gi|971410067|ref|XP_015132490.1|	PH-IRS	IRS1
2.5e-30	104.5	0	5.1e-30	103.5	0	1.5	1	gi|971417889|ref|XP_015149310.1|	PH-IRS	DOK3
5.9e-30	103.3	0	1.1e-29	102.5	0	1.4	1	gi|118086671|ref|XP_419111.2|	PH-IRS	DOK6
2.5e-29	101.3	0	4e-29	100.7	0	1.3	1	gi|363737996|ref|XP_003641936.1|	PH-IRS	DOK4
3e-29	101	0	5.2e-29	100.3	0	1.4	1	gi|971376894|ref|XP_015133368.1|	PH-IRS	IRS2
4.1e-29	100.6	0	1.4e-28	98.9	0	1.8	2	gi|971427787|ref|XP_015152008.1|	PH-IRS	DOK5
7.5e-27	93.4	0	1.4e-26	92.5	0	1.3	1	gi|513225307|ref|XP_004948488.1|	IRS	FRS3
1.1e-24	86.4	0.1	2.3e-24	85.4	0.1	1.5	1	gi|313850991|ref|NP_001186555.1|	IRS	FRS2
1.8e-08	34.4	0	4e-08	33.3	0	1.6	1	gi|971395754|ref|XP_004936253.2|	PH-IRS	DOK7
0.00027	21	0	0.0007	19.7	0	1.7	1	gi|971437419|ref|XP_015132714.1|	B41-IRS-ILWEQ	TLN1
0.0009	19.3	0	0.0022	18	0	1.6	1	gi|363737914|ref|XP_003641925.1|	B41-IRS-ILWEQ	TLN2

## Sheet: Taeniopygia guttata
Zebra Finch PTB Containin Proteins
E-value	score	bias	E-value	score	bias	exp	N	Sequence	Domain composition	Vertebrate/Human Homolog
------- ------ -----	------- ------ -----	---- --	--------	-----------	-----------
7.8e-80	267.1	0.2	3.9e-40	137.1	0	2.2	2	gi|823460364|ref|XP_012429085.1|	WW-PTB-PTB	APBB2
2.5e-63	213	0.1	3.9e-28	97.7	1.5	3.2	3	gi|823452589|ref|XP_012425142.1|	PTB-PTB-TBC	TBC1D4
7.6e-61	204.9	0.2	1.4e-32	112.3	0.1	2.1	2	gi|823468177|ref|XP_012430971.1|	WW-PTB-PTB	APBB3
1.6e-44	151.5	0.8	3.7e-28	97.8	0.1	2.3	2	gi|224088671|ref|XP_002190350.1|	PTB-SH2	SHC3
1.8e-44	151.3	0.2	2.7e-44	150.7	0.2	1.2	1	gi|823464348|ref|XP_004175209.2|	PTB	GULP1
2.6e-43	147.5	0.2	3.8e-43	146.9	0.2	1.3	1	gi|823472862|ref|XP_012426451.1|	ANK-SAM-SAM-PTB	ANKS1A
9.9e-43	145.6	1.7	1.4e-42	145.1	1.7	1.2	1	gi|449502305|ref|XP_002200184.2|	SH3-PTB	MAPK8IP1
4.4e-42	143.4	3.1	2.9e-28	98.1	0.9	3.5	3	gi|823460205|ref|XP_012429019.1|	PTB-PTB-TBC	TBC1D1
5.3e-41	139.9	0.3	8.2e-41	139.3	0.3	1.3	1	gi|823454507|ref|XP_012424558.1|	ANK-SAM-SAM-PTB	ANKS1B
2.6e-39	134.4	0	5.1e-39	133.4	0	1.5	1	gi|224062503|ref|XP_002198568.1|	PTB-SH2	SHC4
3.2e-39	134.1	0.1	3.8e-39	133.8	0.1	1.1	1	gi|823472018|ref|XP_012426069.1|	PTB	LDLRAP1
1.5e-38	131.8	1.7	2.2e-38	131.3	1.7	1.2	1	gi|823481971|ref|XP_012432306.1|	SH3-PTB	MAPK8IP2
1.8e-38	131.6	1.5	2.6e-38	131.1	1.5	1.2	1	gi|823462293|ref|XP_012429666.1|	PTB-NUMBF	NUMB
1.5e-37	128.6	0.3	2.3e-37	128	0.3	1.3	1	gi|823475075|ref|XP_012430831.1|	PTB	NOS1AP
9.6e-35	119.4	0.1	1.5e-34	118.8	0.1	1.2	1	gi|224058312|ref|XP_002198370.1|	PTB	DAB1
2.2e-33	114.9	0	2.9e-33	114.5	0	1.2	1	gi|224087265|ref|XP_002189975.1|	PTB-PDZ-PDZ	APBA3
3.8e-33	114.2	0.3	1.1e-32	112.6	0.1	1.9	2	gi|823472531|ref|XP_012426290.1|	PTB-SH2	SHC1
4.7e-32	110.6	0	5.9e-32	110.3	0	1.1	1	gi|224049003|ref|XP_002188641.1|	PTB	LDLRAP1-Like
1e-31	109.4	0	1.5e-31	108.9	0	1.3	1	gi|823474159|ref|XP_012433031.1|	PTB	DAB2
1.4e-31	109	0	2.1e-31	108.5	0	1.3	1	gi|823463668|ref|XP_012430249.1|	PTENc2-SH2-PTB	TNS1
2.5e-31	108.2	0.1	3.7e-31	107.6	0.1	1.3	1	gi|224073915|ref|XP_002190362.1|	PTB-TBC	RABGAP1
3.3e-31	107.8	0	5.2e-31	107.1	0	1.3	1	gi|224089203|ref|XP_002190319.1|	PTB-PDZ-PDZ	APBA1
2.4e-29	101.7	0.1	4e-29	101	0.1	1.3	1	gi|823456349|ref|XP_012427211.1|	PTENC2-SH2-PTB	TNS3
3.7e-29	101.1	0.1	5.1e-29	100.6	0.1	1.2	1	gi|823466276|ref|XP_012433556.1|	PTB-PDZ-PDZ	APBA2
3.7e-27	94.6	0.2	6.1e-27	93.8	0.2	1.3	1	gi|449501081|ref|XP_002197638.2|	PDZ-PTB-RGS-RBD-RBD	RGS12
1.6e-25	89.2	0	2.8e-25	88.4	0	1.4	1	gi|224096316|ref|XP_002196932.1|	PTB-SH3	EPS8
5.2e-24	84.2	0.2	2.1e-22	79	0.1	2.3	2	gi|823464459|ref|XP_012430582.1|	PTB-TBC	RABGAP1L
5.7e-23	80.8	0.1	9e-23	80.2	0.1	1.2	1	gi|823473310|ref|XP_012426673.1|	PTB-SH2	SHC2
1.5e-21	76.1	0	2e-21	75.7	0	1.1	1	gi|224048707|ref|XP_002197755.1|	PTB	ITGB1BP1
1.5e-20	72.8	0	2.5e-20	72.2	0	1.2	1	gi|449491163|ref|XP_002193976.2|	SH2-PTB	TNS4
9.5e-18	63.7	0.9	9.9e-10	37.4	0.4	2.2	2	gi|823474729|ref|XP_012424871.1|	WW-PTB-PTB	APBB1
3.1e-17	62	0	4.2e-17	61.6	0	1.2	1	gi|823475505|ref|XP_012425922.1|	PTB	FAM43B
8.8e-14	50.7	0.1	1.9e-13	49.6	0.1	1.4	1	gi|823461970|ref|XP_012429538.1|	PTB-SH3	EPS8L2
1e-11	44	0	1.5e-11	43.4	0	1.1	1	gi|224060518|ref|XP_002189231.1|	PTB	FAM43A
3.9e-11	42	0.1	6.9e-11	41.2	0.1	1.5	1	gi|224066068|ref|XP_002193501.1|	BAR-PH-PTB	APPL1
4.8e-11	41.7	1.9	2.5e-10	39.4	1.9	1.9	1	gi|823465242|ref|XP_012430963.1|	PTB	PID1
8.1e-11	41	0	1.5e-10	40.1	0	1.3	1	gi|823471500|ref|XP_012425794.1|	PTB-KIF17	SH2D5- KIF17
6.8e-05	21.6	0	0.00011	20.9	0	1.3	1	gi|224115752|ref|XP_002196383.1|	PTB-CCM2	CCM2
Zebra Finch IRS Containin Proteins
E-value	score	bias	E-value	score	bias	exp	N	Sequence	Domain composition	Vertebrate/Human Homolog
------- ------ -----	------- ------ -----	---- --	--------	-----------	-----------
1.9e-31	107.9	0	3.5e-31	107	0	1.5	1	gi|449498953|ref|XP_002192854.2|	PH-IRS	IRS4
4.9e-31	106.6	0	1e-30	105.6	0	1.5	1	gi|823465232|ref|XP_012430959.1|	PH-IRS	IRS1
2.1e-30	104.5	0	3.4e-30	103.8	0	1.3	1	gi|823466526|ref|XP_012424983.1|	PH-IRS	DOK4
2.4e-30	104.3	0.6	4.2e-30	103.6	0.1	1.6	1	gi|823460524|ref|XP_012429153.1|	PH-IRS	DOK1
3.5e-30	103.8	0	6.1e-30	103.1	0	1.4	1	gi|823456671|ref|XP_012427338.1|	PH-IRS	DOK6
5.3e-29	100	0	1.1e-28	99.1	0	1.5	1	gi|823467867|ref|XP_002193817.3|	PH-IRS	DOK3
6.9e-26	90.1	0	1.5e-25	88.9	0	1.5	1	gi|823475655|ref|XP_012426467.1|	IRS	FRS3
6.2e-25	87	0.1	1.5e-24	85.7	0.1	1.6	1	gi|224094029|ref|XP_002190742.1|	IRS	FRS2
3.6e-16	58.9	0.2	8e-07	28.9	0	2.4	2	gi|224078567|ref|XP_002196028.1|	PH-IRS	DOK5
1.3e-08	34.6	0	3.4e-08	33.3	0	1.7	1	gi|823460462|ref|XP_004176680.2|	PH-IRS	DOK7
0.00023	21	0	0.00058	19.7	0	1.6	1	gi|823474221|ref|XP_012433052.1|	B41-IRS-ILWEQ	TLN1
0.00057	19.7	0	0.00095	19	0	1.2	1	gi|823475653|ref|XP_012426466.1|	IRS	FRS3-Like
0.00077	19.3	0	0.0019	18	0	1.6	1	gi|224062287|ref|XP_002194889.1|	B41-IRS-ILWEQ	TLN2

## Sheet: Anolis carolinensis
Anolis PTB contaning Proteins
E-value	score	bias	E-value	score	bias	exp	N	Sequence	Domain composition	Vertebrate/Human Homolog
------- ------ -----	------- ------ -----	---- --	--------		-----------
5e-76	254.9	0	8.8e-38	129.5	0	2.1	2	gi|637305725|ref|XP_008109834.1|	WW-PTB-PTB	APBB2
2.2e-66	223.3	0	1.4e-32	112.5	0	2.1	2	gi|637376488|ref|XP_003230378.2|	WW-PTB-PTB	APBB1
5.3e-61	205.6	1.7	1.2e-26	93.1	1.7	3.3	3	gi|637280405|ref|XP_008105098.1|	PTB-PTB-TBC	TBC1D4
4.1e-57	192.9	6.8	1.8e-35	121.9	0.2	2.9	2	gi|637291836|ref|XP_008107239.1|	WW-PTB-PTB	APBB3
2.4e-44	151	0.6	1.3e-43	148.6	0.2	2	2	gi|637337241|ref|XP_008115778.1|	PTB	GULP1
2.6e-43	147.7	0.2	4e-43	147	0.2	1.3	1	gi|637295806|ref|XP_008107929.1|	ANK-SAM-SAM-PTB	ANKS1A
1.5e-40	138.6	1.4	2.1e-40	138.1	1.4	1.2	1	gi|637245337|ref|XP_008103794.1|	SH3-PTB	MAPK8IP1
2.3e-40	138	0.3	3.7e-40	137.3	0.3	1.3	1	gi|637301674|ref|XP_008109026.1|	ANK-SAM-SAM-PTB	ANKS1B
9.4e-40	136	0.5	1.4e-39	135.4	0.5	1.3	1	gi|637348453|ref|XP_008117854.1|	PTB	NOS1AP
3.7e-39	134	2	5.6e-39	133.5	2	1.2	1	gi|327259503|ref|XP_003214576.1|	PTB-NUMBF	NUMB
1e-38	132.6	0.1	1.7e-38	131.9	0.1	1.4	1	gi|637363543|ref|XP_008120690.1|	PTB	LDLRAP1
1.5e-38	132.1	0.5	8.1e-26	90.3	0.2	2.2	2	gi|327263369|ref|XP_003216492.1|	PTB-SH2	SHC3
2.1e-38	131.6	5.5	6e-25	87.5	1.9	3.3	3	gi|637344986|ref|XP_008117209.1|	PTB-PTB-TBC	TBC1D1
5.5e-38	130.2	1	7.3e-38	129.8	1	1.2	1	gi|327276353|ref|XP_003222934.1|	PTB-NUMBF	NUMBL
1.1e-36	126	0.4	6.2e-36	123.5	0.4	1.9	1	gi|327290517|ref|XP_003229969.1|	PTB-SH2	SHC2
5.9e-35	120.3	0	8.6e-35	119.8	0	1.3	1	gi|637355176|ref|XP_003227676.2|	PTB-SH2	SHC4
8e-35	119.9	3.3	1.4e-34	119.1	3.3	1.3	1	gi|637367363|ref|XP_008121383.1|	SH3-PTB	MAPK8IP2
1.6e-34	118.9	0.1	2.2e-34	118.4	0.1	1.2	1	gi|637293755|ref|XP_008107585.1|	PTB	DAB1
2.4e-33	115	0	4.1e-33	114.2	0	1.4	1	gi|637370548|ref|XP_003229646.2|	PTB-SH2	SHC1
7.4e-32	110.1	0	1.1e-31	109.6	0	1.3	1	gi|637323792|ref|XP_008113308.1|	C1-PTENC2-SH2-PTB	TNS2
1.6e-30	105.7	0.1	2.3e-30	105.2	0.1	1.3	1	gi|637365130|ref|XP_008120980.1|	PTB-TBC	RABGAP1
8.1e-30	103.4	0	1.2e-29	102.8	0	1.3	1	gi|637248081|ref|XP_008108614.1|	PTENC2-SH2-PTB	TNS1
1.9e-29	102.3	0	3e-29	101.6	0	1.3	1	gi|637261721|ref|XP_008101508.1|	PTB-PDZ-PDZ	APBA1
1.1e-28	99.7	0	1.4e-28	99.4	0	1.1	1	gi|637379416|ref|XP_008123498.1|	PTB	LDLRAP1-LIKE
1.2e-28	99.6	0.1	1.8e-28	99	0.1	1.2	1	gi|637313137|ref|XP_003222271.2|	SH2-PTB	TNS3
2.7e-28	98.5	0	3.6e-28	98	0	1.2	1	gi|637259193|ref|XP_008101053.1|	PTB	DAB2
1e-26	93.3	0.1	1.4e-26	92.8	0.1	1.2	1	gi|637328233|ref|XP_008114133.1|	PDZ-PTB	RGS12
8.9e-26	90.2	0.1	1.6e-25	89.4	0.1	1.4	1	gi|637342894|ref|XP_008116835.1|	PTB-SH3	EPS8
6.8e-20	70.9	0.2	1.1e-19	70.3	0.2	1.3	1	gi|637291250|ref|XP_008107139.1|	PTB-TBC	RABGAP1L
9.2e-20	70.5	0	1.1e-19	70.2	0	1.1	1	gi|327261228|ref|XP_003215433.1|	PTB	ITGB1BP1
2.1e-19	69.4	0	3e-19	68.8	0	1.2	1	gi|637361524|ref|XP_008120304.1|	PTB	APBA2
2.5e-19	69.1	0	4.4e-19	68.3	0	1.3	1	gi|637314897|ref|XP_008111582.1|	SH2-PTB	TNS4
4.6e-12	45.3	0.2	8.1e-12	44.5	0.2	1.4	1	gi|327265927|ref|XP_003217759.1|	BAR-PH-PTB	APPL1
1.7e-11	43.4	0.2	3.3e-11	42.4	0.2	1.4	1	gi|637246830|ref|XP_008106471.1|	PTB-SH3	EPS8L2
2.5e-11	42.8	1.3	2.8e-10	39.4	0.5	2	2	gi|637276917|ref|XP_008104435.1|	PTB	PID1
2.6e-10	39.6	0	4.2e-10	38.8	0	1.3	1	gi|637342120|ref|XP_008116680.1|	PTB-SH3	EPS8L1
4.7e-09	35.4	0.1	8.6e-09	34.6	0.1	1.4	1	gi|637300470|ref|XP_008108802.1|	BAR-PH-PTB	APPL2
9.6e-05	21.3	0	0.00015	20.6	0	1.2	1	gi|637294806|ref|XP_008107763.1|	PTB-SH3	EPS8L3
0.00015	20.7	0.2	0.0003	19.6	0	1.5	1	gi|637373585|ref|XP_008122525.1|	PTB-CCM2	CCM2
0.00063	18.6	1.8	0.0014	17.5	1.8	1.6	1	gi|637267608|ref|XP_008102639.1|	RUN-PDZ-PTB	NOVEL NOT HUMAN
0.0056	15.5	0	0.0081	15	0	1.2	1	gi|637355069|ref|XP_008119061.1|	PTB	CCM2L
Anolis IRS contaning Proteins
E-value	score	bias	E-value	score	bias	exp	N	Sequence	Domain composition	Vertebrate/Human Homolog
------- ------ -----	------- ------ -----	---- --	--------		-----------	-----------
2.3e-33	114.2	0	4.5e-33	113.3	0	1.5	1	gi|637368072|ref|XP_008121503.1|	PH-IRS	DOK1
9.7e-32	109	0	1.9e-31	108.1	0	1.5	1	gi|637321631|ref|XP_008112891.1|	PH-IRS	IRS4
9.1e-31	105.9	0	1.6e-30	105.1	0	1.4	1	gi|327267101|ref|XP_003218341.1|	PH-IRS	IRS1
5.8e-30	103.3	0	1.1e-29	102.5	0	1.4	1	gi|327269982|ref|XP_003219771.1|	PH-IRS	DOK6
2.8e-29	101.1	0	5.8e-29	100.1	0	1.5	1	gi|637350190|ref|XP_008118167.1|	PH-IRS	DOK5
4.1e-29	100.6	0	8.4e-29	99.6	0	1.5	1	gi|327265661|ref|XP_003217626.1|	PH-IRS	DOK3
1e-27	96.1	0	1.8e-27	95.3	0	1.4	1	gi|637362636|ref|XP_008120523.1|	PH-IRS	DOK4
1.2e-27	95.9	0	1.9e-27	95.3	0	1.2	1	gi|637251516|ref|XP_008114633.1|	PH-IRS	IRS2
2e-26	91.9	0	4.4e-26	90.9	0	1.4	1	gi|637295608|ref|XP_003220376.2|	IRS	FRS3
3.6e-25	87.9	0	7.9e-25	86.8	0	1.5	1	gi|327279841|ref|XP_003224664.1|	IRS	FRS2
6.9e-25	87	0	2.4e-24	85.3	0	1.9	2	gi|637376092|ref|XP_008122946.1|	IRS	IRS1-LIKE
6.8e-09	35.7	0	1.8e-08	34.4	0	1.7	1	gi|637328218|ref|XP_008114129.1|	PH-IRS	DOK7
0.00026	21	0	0.00067	19.7	0	1.6	1	gi|637364963|ref|XP_003228922.2|	B41-IRS-ILWEQ	TLN1
0.00056	19.9	0	0.0014	18.6	0	1.7	1	gi|637374274|ref|XP_008122647.1|	B41-IRS-ILWEQ	TLN2

## Sheet: Xenopus tropicalis
X tropicalis PTB Domain Containing Proteins
E-value	score	bias	E-value	score	bias	exp	N	Sequence	Domain composition	Vertebrate/Human Homolog
------- ------ -----	------- ------ -----	---- --	--------	-----------	----------------
3.2e-76	255.6	0.1	3e-39	134.5	0	2.2	2	gi|183986669|ref|NP_001116923.1|	WW-PTB-PTB	APBB2
1.2e-59	201.4	1.2	7.3e-34	116.9	0.4	2.1	2	gi|156717724|ref|NP_001096402.1|	WW-PTB-PTB	APBB3
2.2e-51	174.2	2.7	8.1e-25	87.2	0.5	3.4	3	gi|512821695|ref|XP_002931984.2|	PTB-PTB-TBC	TBC1D4
1.1e-40	139.3	0.4	1.9e-40	138.4	0.4	1.4	1	gi|163914979|ref|NP_001106480.1|	ANK-SAM-SAM-PTB	ANKS1A
1.7e-40	138.6	0.9	2.4e-40	138.1	0.9	1.3	1	gi|118404412|ref|NP_001072715.1|	PTB	NOS1AP
2.6e-39	134.7	0.1	5.2e-39	133.7	0.1	1.5	1	gi|512827467|ref|XP_002936616.2|	PTB-SH2	SHC4
4.8e-39	133.8	0.2	6.1e-39	133.5	0.2	1.1	1	gi|62859367|ref|NP_001017114.1|	PTB	LDLRAP1
4.1e-38	130.8	2	5.8e-38	130.3	2	1.2	1	gi|301624114|ref|XP_002941353.1|	PTB	NOS1APL
6.2e-38	130.2	1	1e-37	129.5	1	1.4	1	gi|847158792|ref|XP_002938862.3|	PTB-NUMBF	NUMBL
7.8e-38	129.9	1.5	1.1e-37	129.4	1.5	1.2	1	gi|847152675|ref|XP_012823284.1|	PTB-NUMBF	NUMB
8.9e-38	129.7	0.6	1.4e-37	129	0.6	1.3	1	gi|148233938|ref|NP_001090670.1|	SH3-PTB	MAPK8IP2
5.8e-37	127	0.5	8.4e-37	126.5	0.5	1.2	1	gi|512833355|ref|XP_002934139.2|	SH3-PTB	MAPK8IP1
6.3e-37	126.9	0.2	1.8e-36	125.4	0.2	1.7	1	gi|154147635|ref|NP_001093734.1|	PTB-SH2	SHC3
1.4e-34	119.2	0.5	1.3e-33	116.1	0.5	2	1	gi|512814196|ref|XP_002939812.2|	PTB-SH2	SHC2
7.7e-33	113.5	0.1	1e-32	113.1	0.1	1.2	1	gi|166158176|ref|NP_001107290.1|	PTB	DAB1
1.4e-31	109.3	0.3	5.6e-27	94.3	0.4	2.5	2	gi|512814155|ref|XP_004910990.1|	PTB-TBC	TBC1D1
1.6e-31	109.2	0	2.7e-31	108.4	0	1.4	1	gi|512822579|ref|XP_002936689.2|	C1-PTEN_C2-SH2-PTB	TNS2
3.1e-31	108.2	0.3	8.3e-31	106.8	0.3	1.7	1	gi|512887461|ref|XP_002942102.2|	PTB-SH2	SHC1
8.3e-31	106.8	0	1.2e-30	106.3	0	1.3	1	gi|512810509|ref|XP_004910500.1|	PTB	DAB2
8.5e-31	106.8	0	1.2e-30	106.3	0	1.2	1	gi|512815107|ref|XP_002941438.2|	PTB-PDZ-PDZ	APBA3
1e-30	106.6	0.1	1.5e-30	106	0.1	1.3	1	gi|301612263|ref|XP_002935634.1|	PTB-PDZ-PDZ	APBA1
2.1e-30	105.5	0.2	2.8e-30	105.1	0.2	1.1	1	gi|847115219|ref|XP_012815586.1|	PTB	ANKS1B (PARTIAL)
6.4e-29	100.7	0	1.1e-28	99.8	0	1.4	1	gi|847136446|ref|XP_012820499.1|	PTEN_C2-SH2-PTB	TNS3
1.1e-28	99.9	0.1	1.8e-28	99.2	0.1	1.3	1	gi|847170363|ref|XP_012808683.1|	PTB-TBC	RABGAP1
3.3e-28	98.3	0.1	4.7e-28	97.8	0.1	1.2	1	gi|512867659|ref|XP_004917984.1|	PTB-PDZ-PDZ	APBA2
2.6e-27	95.4	0	4.1e-27	94.7	0	1.3	1	gi|847165849|ref|XP_012826379.1|	C1-PTEN_C2-SH2-PTB	TNS1
1.2e-25	89.9	0.1	1.7e-25	89.4	0.1	1.2	1	gi|847095815|ref|XP_012811188.1|	PDZ-PTB-RGS-RBD-RBD	RGS12
4.9e-23	81.4	0.1	8.5e-23	80.6	0.1	1.4	1	gi|118405012|ref|NP_001072508.1|	PTB-SH3	EPS8
3.7e-22	78.5	0.7	5.4e-22	78	0.7	1.2	1	gi|847164329|ref|XP_012826107.1|	PTB	GULP1
4.8e-22	78.1	0.2	7.8e-22	77.5	0.2	1.3	1	gi|512874133|ref|XP_004918749.1|	SH2-PTB	TNS4
5.5e-21	74.7	3.9	1.2e-20	73.6	1.1	2.2	2	gi|847118543|ref|XP_012816645.1|	PTB-TBC	RABGAP1L
3e-19	69	0	4e-19	68.6	0	1.1	1	gi|156717668|ref|NP_001096374.1|	PTB	ITGB1AP1
1.3e-16	60.3	0	1.8e-16	59.9	0	1.2	1	gi|166158242|ref|NP_001107499.1|	PTB	FAM43A
3.4e-16	59	0	4.4e-16	58.6	0	1.1	1	gi|512832984|ref|XP_004913383.1|	PTB	FAM43B
3.8e-16	58.8	0.2	1.5e-15	56.9	0	1.9	2	gi|512835470|ref|XP_002937551.2|	PTB-SH3	EPS8L2
7e-15	54.7	0	8.6e-15	54.4	0	1.1	1	gi|847164196|ref|XP_012826081.1|	PTB	GULP1L
1.7e-11	43.5	0.1	3.1e-11	42.7	0.1	1.3	1	gi|163915073|ref|NP_001106389.1|	BAR-PH-PTB	APPL2
4e-11	42.4	3.2	2.5e-10	39.7	3.2	1.9	1	gi|512866931|ref|XP_002933387.2|	PTB	PID1
5.7e-11	41.8	0.1	9.1e-11	41.2	0.1	1.3	1	gi|847121284|ref|XP_004914231.2|	BAR-PH-PTB	APPL1
4e-07	29.2	0.1	5.6e-07	28.8	0.1	1.2	1	gi|512871608|ref|XP_002940021.2|	RUN-PDZ-PTB	Novel VERTEBRATE NOT HUMAN
3.6e-06	26.1	1.1	0.00024	20.2	0	3.1	3	gi|847136574|ref|XP_012820534.1|	PTB-CCM2	CCM2
6.4e-05	22	0	0.0001	21.3	0	1.3	1	gi|301617795|ref|XP_002938326.1|	PTB-SH3	EPS8L1
X tropicalis IRS Domain Containing Proteins
E-value	score	bias	E-value	score	bias	exp	N	Sequence	Domain composition	Vertebrate/Human Homolog
------- ------ -----	------- ------ -----	---- --	--------		-----------	-----------
7.2e-36	122.4	0.1	1.2e-35	121.8	0.1	1.3	1	gi|847177028|ref|XP_002943528.3|	PH-IRS	DOK1
4.1e-31	107.2	0	9.7e-31	106	0	1.7	1	gi|301615358|ref|XP_002937134.1|	PH-IRS	IRS1
1.5e-30	105.4	0.1	2.6e-30	104.6	0.1	1.4	1	gi|213982817|ref|NP_001135469.1|	PH-IRS	IRS4
2.5e-30	104.6	0.1	4e-30	104	0.1	1.3	1	gi|847176985|ref|XP_002942635.2|	PH-IRS	IRS1-like
3.1e-30	104.3	0	5.9e-30	103.5	0	1.4	1	gi|512850314|ref|XP_002939664.2|	PH-IRS	DOK6
1.7e-29	102	0.1	6.8e-29	100	0	2	2	gi|512822852|ref|XP_002933054.2|	PH-IRS	IRS2
4.4e-29	100.6	0	8.1e-29	99.8	0	1.4	1	gi|512826955|ref|XP_002932742.2|	PH-IRS	DOK2
1.4e-28	99	0	3.6e-28	97.7	0	1.6	2	gi|301611841|ref|XP_002935431.1|	PH-IRS	DOK5
2.2e-27	95.2	0	4.1e-27	94.3	0	1.4	1	gi|118404862|ref|NP_001072558.1|	PH-IRS	DOK4
5.4e-27	93.9	0.1	1.1e-26	93	0.1	1.4	1	gi|165973398|ref|NP_001107141.1|	IRS	FRS3
1.2e-25	89.7	0.1	2.3e-25	88.7	0.1	1.4	1	gi|198282049|ref|NP_001128281.1|	IRS	FRS2
3.6e-16	59.2	0	7.3e-16	58.2	0	1.5	1	gi|847163640|ref|XP_012825909.1|	IRS	FRS2-LIKE
4.3e-09	36.5	0	1.1e-08	35.1	0	1.7	1	gi|512816906|ref|XP_002939270.2|	PH-IRS	DOK7
0.00061	20	0	0.0017	18.6	0	1.7	1	gi|847147370|ref|XP_012822328.1|	B41-IRS-ILWEQ	TLN2

## Sheet: Danio rerio
Zebrafish PTB Domain Containing Proteins
E-value	score	bias	E-value	score	bias	exp	N	Sequence	Description	Vertebrate/Human Homolog
------- ------ -----	------- ------ -----	---- --	--------	-----------
3e-74	249.5	0.2	1.7e-36	125.7	0	2.2	2	gi|688532283|ref|XP_005168433.2|	WW-PTB-PTB	APBB2
2.6e-73	246.4	0.1	6.7e-37	127.1	0	2.2	2	gi|528491794|ref|XP_005155644.1|	WW-PTB-PTB	APBB1
2.7e-68	229.9	1.7	4.9e-36	124.2	0.1	2.3	2	gi|1040662697|ref|XP_005173114.2|	PTB-PTB	APBB2-Like
3.4e-62	209.9	0.3	1.4e-33	116.1	0.1	2.2	2	gi|688606683|ref|XP_009293946.1|	WW-PTB-PTB	APBB3
3.4e-58	196.8	0.4	1.5e-25	89.9	0.4	3.2	3	gi|528490286|ref|XP_005167832.1|	PTB-PTB-TBC	TBC1D4
3.5e-43	147.6	0.2	4.6e-43	147.3	0.2	1.2	1	gi|1040679252|ref|XP_017209107.1|	ANK-SAM-SAM-PTB	ANKS1A
1.6e-42	145.5	0.3	2.1e-42	145.1	0.3	1.1	1	gi|55742422|ref|NP_001007183.1|	PTB	GULP1
2e-41	141.9	0.3	9.4e-41	139.7	0.3	2	1	gi|1040677104|ref|XP_017208646.1|	PTB-SH2	SHC2
7.3e-41	140	0.3	1.1e-40	139.5	0.3	1.3	1	gi|1040685843|ref|XP_017210541.1|	ANK-SAM-SAM-PTB	ANKS1B
8e-41	139.9	3.2	8.9e-30	103.7	1.9	3.2	2	gi|528467846|ref|XP_005168426.1|	PTB-PTB-TBC	TBC1D1
7.7e-40	136.7	0.6	1.2e-39	136.1	0.6	1.2	1	gi|528501323|ref|XP_005173435.1|	PTB-NUMBF	NUMBL
4.3e-38	131	1.7	6.2e-38	130.5	1.7	1.2	1	gi|94536731|ref|NP_001035496.1|	PTB-NUMBF	NUMB
5.7e-37	127.3	0.1	7.3e-37	126.9	0.1	1.1	1	gi|123708080|ref|NP_001074104.1|	PTB	LDLRAP1
8.9e-37	126.7	2.4	1.3e-36	126.1	2.4	1.3	1	gi|1040693117|ref|XP_017212132.1|	PTB	NOS1AP
1.5e-36	125.9	0.9	2.2e-36	125.4	0.9	1.3	1	gi|528479650|ref|XP_001919814.3|	PTB	NOS1AP-Like
1.7e-36	125.7	2.1	3e-36	124.9	2.1	1.4	1	gi|528507517|ref|XP_685086.6|	SH3-PTB	MAPK8IP2
6.9e-36	123.7	0.2	3.8e-27	95.1	0	2.3	2	gi|688604238|ref|XP_009293368.1|	SH2-PTB	SHC3
1.2e-35	122.9	1	1.6e-35	122.5	1	1.2	1	gi|1040682048|ref|XP_017209620.1|	SH3-PTB	MAPK8IP1-Like
5.1e-35	120.9	0.1	6.6e-35	120.5	0.1	1.2	1	gi|39752651|ref|NP_945331.1|	PTB	LDLRAP1-Like
2.1e-34	118.9	0.5	3e-34	118.4	0.5	1.2	1	gi|688566347|ref|XP_009301942.1|	SH3-PTB	MAPK8IP1
1.1e-33	116.5	0.8	3.1e-33	115	0.8	1.6	1	gi|1040666300|ref|XP_017206983.1|	SH2-PTB	SHC1
2.1e-33	115.6	0.1	2.8e-33	115.2	0.1	1.2	1	gi|688601395|ref|XP_009292841.1|	PTB	DAB1
1.9e-32	112.5	1.1	2.6e-32	112	1.1	1.2	1	gi|528470287|ref|XP_002660758.2|	PTB	NOS1AP-Like2
1.6e-31	109.4	0.1	2.7e-31	108.7	0.1	1.4	1	gi|528491789|ref|XP_005155643.1|	PTB-PDZ-PDZ	APBA1-Like
3.6e-31	108.3	0.9	5.5e-31	107.7	0.9	1.3	1	gi|1040693549|ref|XP_017212236.1|	SAM-SAM-PTB	ANKS1A-Like
2.5e-30	105.5	0	4.2e-30	104.8	0	1.3	1	gi|528480216|ref|XP_001920879.3|	PTB	DAB2
7.8e-30	103.9	0	1.1e-29	103.4	0	1.3	1	gi|125817179|ref|XP_001343372.1|	PTB-PDZ-PDZ	APBA1
9.1e-29	100.4	0	1.3e-28	99.9	0	1.3	1	gi|528517373|ref|XP_001921043.2|	C1-PTEN_C2-SH2-PTB	TNS2
1.3e-28	99.9	0	2.3e-28	99.1	0	1.4	1	gi|1040699357|ref|XP_017213336.1|	C1-PTEN_C2-SH2-PTB	TNS1
8.9e-28	97.2	0.1	1.2e-27	96.7	0.1	1.2	1	gi|1032801253|ref|NP_001314801.1|	PTB	DAB2-Like
9.2e-28	97.1	0.2	1.2e-27	96.7	0.2	1.2	1	gi|528470051|ref|XP_005171167.1|	PTB	DAB1-Like
1.5e-27	96.5	0	2.3e-27	95.8	0	1.3	1	gi|326671580|ref|XP_003199465.1|	PTB-PDZ-PDZ	APBA1-Like
2.6e-27	95.6	0.1	3.8e-27	95.1	0.1	1.3	1	gi|1040656669|ref|XP_017213494.1|	PTB-TBC	RABGAP1
3e-27	95.4	0.2	6.3e-27	94.4	0.2	1.5	1	gi|688601377|ref|XP_009292834.1|	PTEN_C2-SH2-PTB	TNS3
3.1e-26	92.1	0	4.5e-26	91.6	0	1.2	1	gi|528485251|ref|XP_005168985.1|	PTB-PDZ-PDZ	APBA2
8.5e-26	90.7	0.1	1.3e-25	90.1	0.1	1.3	1	gi|1040682780|ref|XP_017209761.1|	PTB-PDZ-PDZ	APBA2-Like
2.8e-25	89	0.2	4.6e-25	88.3	0.2	1.3	1	gi|47550843|ref|NP_999889.1|	PDZ-PTB-RGS-RBD-RBD	RGS12
3.9e-24	85.2	0	7e-24	84.4	0	1.3	1	gi|688559760|ref|XP_009300586.1|	C1-PTEN_C2-SH2-PTB	TNS1-Like
9.1e-24	84	0	1.6e-23	83.2	0	1.3	1	gi|528483007|ref|XP_694169.6|	C1-PTEN_C2-SH2-PTB	TNS2-Like
8.1e-22	77.6	0	1.3e-21	76.9	0	1.2	1	gi|688545626|ref|XP_009298188.1|	PTB-SH3	EPS8
1.3e-20	73.7	0.7	2.3e-20	72.9	0.7	1.4	1	gi|528516094|ref|XP_003201082.2|	PTB-TBC	RABGAPIL
9.3e-20	70.9	0	1.3e-19	70.4	0	1.1	1	gi|52218938|ref|NP_001004547.1|	PTB	FAM43B
2.6e-17	62.9	0	3.5e-17	62.5	0	1.1	1	gi|82658228|ref|NP_001032486.1|	PTB	ITG1BP1
3.1e-17	62.6	0	4.5e-17	62.1	0	1.2	1	gi|47550721|ref|NP_999870.1|	PTB	FAM43A
5.5e-15	55.3	0.1	8.6e-15	54.6	0.1	1.3	1	gi|326680015|ref|XP_002666818.2|	PTB-SH3	EPS8L2
2.4e-14	53.1	0.2	4.3e-14	52.3	0.2	1.4	1	gi|189303538|ref|NP_001121546.1|	BAR-PH-PTB	APPL1
9.7e-14	51.2	0	2e-13	50.2	0	1.5	1	gi|1040653356|ref|XP_017209868.1|	PTEN_C2-SH2-PTB	TNS3-Like
6e-11	42	0.4	1e-10	41.2	0.4	1.4	1	gi|688580683|ref|XP_001341328.6|	RUN-PDZ-PTB	NOT HUMAN
7.9e-11	41.6	0.5	6e-10	38.8	0.4	2.2	2	gi|189521247|ref|XP_697589.3|	PTB	LDLRAP1-Like2
2.4e-10	40	0.2	4.6e-10	39.1	0.2	1.4	1	gi|189339188|ref|NP_001121547.1|	BAR-PH-PTB	APPL2
5.7e-10	38.8	3.1	2.4e-09	36.8	3.1	1.8	1	gi|1040668729|ref|XP_017207408.1|	PTB	PID1
3.3e-09	36.3	0.5	5.7e-09	35.5	0.5	1.3	1	gi|528484565|ref|XP_699097.4|	PDZ-PTB-RGS-RBD-RBD	RGS12-Like
2.4e-07	30.2	0.3	4.2e-07	29.4	0.3	1.4	1	gi|1034218566|ref|NP_001315008.1|	PTB-SH3	EPS8L3
1.4e-06	27.7	0.3	2.5e-06	26.9	0.3	1.4	1	gi|528494818|ref|XP_005169461.1|	PTB-SH2	SH2D5
2e-06	27.2	0.1	2.8e-05	23.5	0	2.1	2	gi|50539698|ref|NP_001002315.1|	PTB-CCM2	CCM2
0.0067	15.7	0	0.014	14.6	0	1.4	1	gi|1040680200|ref|XP_017209268.1|	PTB-CCM2	CCM2L
0.0068	15.6	0	0.087	12	0	2.2	2	gi|292625915|ref|XP_002666161.1|	PTB-SH3	EPS8L3-Like
								gi|528520465|ref|XP_005170855.1|	(PTB)-SH3	EPS8L1
Zebrafish IRS Domain Containing Proteins
E-value	score	bias	E-value	score	bias	exp	N	Sequence	Description	Vertebrate/Human Homolog
------- ------ -----	------- ------ -----	---- --	--------	-----------
2.2e-35	121.1	0.1	5e-35	120	0	1.6	1	gi|47085821|ref|NP_998253.1|	PH-IRS	DOK1
1.7e-31	108.6	0	3.1e-31	107.8	0	1.4	1	gi|1040697611|ref|XP_001341514.6|	PH-IRS	DOK2
3.3e-31	107.7	0	5.7e-31	106.9	0	1.4	1	gi|326674337|ref|XP_687702.4|	PH-IRS	IRS1
4.4e-31	107.3	0	8.6e-31	106.4	0	1.5	1	gi|688565427|ref|XP_009301723.1|	PH-IRS	IRS2-Like
7.2e-31	106.6	0	1.3e-30	105.8	0	1.4	1	gi|292617489|ref|XP_700746.4|	PH-IRS	IRS2
8.2e-31	106.4	0.1	1.8e-30	105.3	0.1	1.6	1	gi|41053451|ref|NP_956609.1|	PH-IRS	IRS2-Like2
3.5e-30	104.4	0.1	1.3e-29	102.6	0	1.9	2	gi|147901195|ref|NP_001082908.1|	PH-IRS	DOK6
7.6e-30	103.3	0	1.5e-29	102.4	0	1.5	1	gi|326669309|ref|XP_001920152.3|	PH-IRS	IRS2-Like3
1.2e-29	102.7	0	2.1e-29	101.9	0	1.3	1	gi|125821470|ref|XP_697365.2|	PH-IRS	DOK4
1.3e-29	102.5	0	2.4e-29	101.7	0	1.4	1	gi|528479969|ref|XP_695297.4|	PH-IRS	DOK1-Like
1.7e-29	102.2	0	3.2e-29	101.3	0	1.5	1	gi|528514514|ref|XP_002666121.3|	PH-IRS	IRS2-Like4
2.3e-29	101.8	0.1	4.4e-29	100.9	0.1	1.5	1	gi|528468648|ref|XP_687576.4|	PH-IRS	DOK1-Like2
1.3e-26	93	0	2.5e-25	88.8	0	2.2	2	gi|688619741|ref|XP_002664535.3|	PH-IRS	DOK3
1.8e-26	92.5	0.1	3.5e-26	91.6	0.1	1.4	1	gi|326668781|ref|XP_002662545.2|	IRS	FRS2
2e-26	92.3	0	4.4e-26	91.2	0	1.5	1	gi|1040685748|ref|XP_017210517.1|	IRS	FRS2-Like
1.8e-25	89.3	0	3.4e-25	88.4	0	1.3	1	gi|959672198|ref|NP_001002658.2|	IRS	FRS2-Like2
2.1e-25	89.1	0	4.3e-25	88.1	0	1.5	1	gi|528492075|ref|XP_005155412.1|	PH-IRS	DOK3-Like
3.8e-09	36.9	0.1	3.7e-08	33.7	0	2.3	2	gi|528486507|ref|XP_002663080.3|	IRS	DOK7 PTB-Like
5.7e-08	33.1	0	2.5e-07	31.1	0	2	2	gi|528468644|ref|XP_686127.5|	PH-IRS	DOK7
0.00018	21.9	0	0.00048	20.5	0	1.7	1	gi|528491537|ref|XP_005155556.1|	B41-IRS-ILWEQ	TLN1
0.00042	20.7	0	0.001	19.5	0	1.6	1	gi|1040682144|ref|XP_017209646.1|	B41-IRS-ILWEQ	TLN2-Like
0.001	19.5	0	0.0026	18.2	0	1.6	1	gi|1040694172|ref|XP_017212354.1|	B41-IRS-ILWEQ	TLN2

## Sheet: Takifugu rubripes
Fugu PTB Domain Containing Proteins
E-value	score	bias	E-value	score	bias	exp	N	Sequence	Domain composition	Vertebrate/Human Homolog
------- ------ -----	------- ------ -----	---- --	--------	-----------
3.3e-75	252.2	0.6	9.9e-37	126.2	0	2.1	2	gi|768937519|ref|XP_011608982.1|	PTB	APBB2-Like
6.1e-73	244.8	0.1	9e-37	126.3	0	2.2	2	gi|768942270|ref|XP_011610913.1|	WW-PTB-PTB	APBB2
4.4e-71	238.7	0.1	1.4e-38	132.2	0	2.2	2	gi|768932444|ref|XP_011606870.1|	WW-PTB-PTB	APBB1
1.6e-61	207.4	0.1	2.5e-32	111.8	0	2.3	2	gi|768938949|ref|XP_011609563.1|	WW-PTB-PTB	APBB3
3.9e-53	179.9	2.9	3.3e-28	98.2	1	3.3	3	gi|768909752|ref|XP_011605137.1|	PTB-PTB-TBC	TBC1D4
8.4e-45	152.6	0.7	1.1e-44	152.2	0.7	1.1	1	gi|768911045|ref|XP_011610552.1|	PTB	GULP1
3.4e-42	144.1	0.3	5.3e-42	143.4	0.3	1.3	1	gi|768944008|ref|XP_011611628.1|	ANK-SAM-SAM-PTB	ANKS1B
5.3e-42	143.4	0.3	7.3e-42	143	0.3	1.2	1	gi|768914744|ref|XP_011600948.1|	ANK-SAM-SAM-PTB	ANKS1A
1.4e-39	135.5	0.6	2.1e-39	135	0.6	1.2	1	gi|768932880|ref|XP_011607048.1|	PTB-NUMBF	NUMBL
1.5e-39	135.5	0.1	4.2e-39	133.9	0.1	1.7	1	gi|410903546|ref|XP_003965254.1|	PTB-SH2	SHC3
1.8e-39	135.2	0.7	2.4e-39	134.7	0.7	1.2	1	gi|768935624|ref|XP_011608184.1|	SH3-PTB	MAPK8IP1
2e-39	135	0.1	1e-38	132.6	0.1	1.9	1	gi|768947631|ref|XP_011613122.1|	PTB-SH2	SHC2
3.1e-38	131.1	1	4.1e-38	130.7	1	1.2	1	gi|768959690|ref|XP_011618128.1|	PTB-NUMBF	NUMB
6.2e-38	130.1	0.7	8.7e-38	129.6	0.7	1.2	1	gi|768919548|ref|XP_011602958.1|	PTB	NOS1AP
5.9e-37	126.9	1.3	1e-36	126.1	1.3	1.4	1	gi|410907405|ref|XP_003967182.1|	SH3-PTB	MAPK8IP2
7.4e-37	126.6	0.1	9.5e-37	126.2	0.1	1.2	1	gi|768940867|ref|XP_011610337.1|	PTB	LDLRAP1-Like
2.9e-35	121.4	0	3.6e-35	121	0	1.1	1	gi|410911140|ref|XP_003969048.1|	PTB	LDLRAP1B
1.8e-34	118.7	0.3	2.6e-34	118.2	0.3	1.2	1	gi|768911851|ref|XP_011613935.1|	PTB	LDLRAP1
2.7e-34	118.2	0.6	4.1e-34	117.6	0.6	1.3	1	gi|768953861|ref|XP_011615710.1|	SAM-SAM-PTB	ANKS1A-Like
3.9e-34	117.7	0.9	8.6e-34	116.5	0.9	1.5	1	gi|768922341|ref|XP_011604114.1|	PTB-SH2	SHC1
1e-32	113	3.4	1.5e-32	112.5	3.4	1.2	1	gi|768954357|ref|XP_011615923.1|	SH3-PTB	MAPK8IP1-Like
8e-31	106.8	3.6	1.4e-30	106	3.6	1.3	1	gi|410924778|ref|XP_003975858.1|	PTB	NOS1APL
2.4e-30	105.2	0.1	3.4e-30	104.8	0.1	1.1	1	gi|768952113|ref|XP_011614973.1|	PTB	DAB1-Like
4.1e-30	104.5	0.1	9.2e-30	103.3	0.1	1.6	1	gi|410903398|ref|XP_003965180.1|	PTB-PDZ-PDZ	APBA1-Like
2e-29	102.2	0.3	2.7e-29	101.8	0.3	1.2	1	gi|768919656|ref|XP_011603000.1|	PTB	DAB2
3.7e-29	101.4	0.2	5.7e-29	100.8	0.2	1.2	1	gi|410923769|ref|XP_003975354.1|	SH2-PTB	TNS3
8e-29	100.3	0.1	1.2e-28	99.7	0.1	1.2	1	gi|768947047|ref|XP_011612877.1|	PTB	DAB1
8.8e-29	100.1	0.5	8.6e-24	83.8	0.5	2.3	2	gi|768958602|ref|XP_011617681.1|	PTB-PTB-TBC	TBC1D1
6.1e-28	97.4	0	7.1e-28	97.2	0	1.1	1	gi|768924072|ref|XP_011604861.1|	PTB	GULP1-Like
6.6e-28	97.3	0	1e-27	96.6	0	1.3	1	gi|410922180|ref|XP_003974561.1|	PTB-PDZ-PDZ	APBA1
3.3e-27	95	0	5.4e-27	94.3	0	1.3	1	gi|768911057|ref|XP_011610648.1|	PTEN_C2-SH2-PTB	TNS1-Like
7.4e-27	93.8	0.1	1.1e-26	93.3	0.1	1.3	1	gi|410921790|ref|XP_003974366.1|	PTB-PDZ-PDZ	APBA3
8e-27	93.7	0	1.1e-26	93.2	0	1.2	1	gi|768936393|ref|XP_003969997.2|	PTB-PDZ-PDZ	APBA2
1e-26	93.4	0.2	1.8e-26	92.6	0.2	1.4	1	gi|410908621|ref|XP_003967789.1|	PTB-PDZ-PDZ	APBA2-Like
1.1e-26	93.3	0	1.6e-26	92.7	0	1.3	1	gi|768923654|ref|XP_011604679.1|	C1-PTEN_C2-SH2PTB	TNS1
9.7e-26	90.2	0	1.6e-25	89.4	0	1.3	1	gi|768946278|ref|XP_011612567.1|	PTEN_C2-SH2-PTB	TNS2
4.9e-25	87.9	0	8.1e-25	87.1	0	1.3	1	gi|768957822|ref|XP_011617348.1|	PTB	FAM43B
1e-24	86.8	0.2	2.5e-24	85.5	0.2	1.6	1	gi|768935885|ref|XP_011608302.1|	PTB-SH2	SHC4
2.2e-21	75.9	0.2	3.2e-21	75.3	0.2	1.2	1	gi|768943167|ref|XP_011611287.1|	PDZ-PTB-RGS-RBD-RBD	RGS12
6.1e-21	74.4	0.6	1.1e-20	73.5	0.6	1.3	1	gi|768957309|ref|XP_011617142.1|	PTEN_C2-SH2-PTB	TNS3-Like
1.9e-20	72.8	1	3.2e-20	72.1	1	1.4	1	gi|768948482|ref|XP_011613464.1|	PTB	NOS1AP-Like2
3e-19	68.9	0	5.3e-19	68.1	0	1.3	1	gi|768954042|ref|XP_011615787.1|	PTB-SH3	EPS8
2.2e-18	66.1	0.7	3.5e-18	65.4	0.1	1.6	1	gi|768948250|ref|XP_011613370.1|	PTB-TBC	RABGAP1L
9.8e-18	63.9	0	1.4e-17	63.4	0	1.2	1	gi|410921582|ref|XP_003974262.1|	PTB	FAM43A
1.1e-17	63.8	0.2	1.6e-17	63.2	0.2	1.3	1	gi|768930052|ref|XP_011605891.1|	PTB-SH3	EPS8L2
1.9e-17	63	0	2.5e-17	62.6	0	1.1	1	gi|410898096|ref|XP_003962534.1|	PTB	ITGB1BP1
2.8e-17	62.4	0.1	3.6e-17	62.1	0.1	1.1	1	gi|768963816|ref|XP_011619775.1|	PTB	RABGAP1 (PARTIAL)
1.2e-16	60.4	0	1.8e-16	59.8	0	1.3	1	gi|768954172|ref|XP_011615842.1|	SH2-PTB	TNS3-Like2
2.5e-13	49.5	0	4.2e-13	48.7	0	1.3	1	gi|768942152|ref|XP_011610861.1|	SH2-PTB	TNS4
1.5e-10	40.4	1.5	4e-10	39	1.5	1.6	1	gi|410927203|ref|XP_003977054.1|	PTB	PID1
3e-10	39.4	1.4	1.3e-09	37.3	1.4	1.8	1	gi|768924446|ref|XP_011605011.1|	PTB	LDLRAP1-Like
2.3e-09	36.5	0	4.2e-09	35.6	0	1.3	1	gi|768924313|ref|XP_011604956.1|	PDZ-PTB-RGS-RBD-RBD	RGS12-Like
4.9e-08	32.1	0.8	1.4e-07	30.7	0.8	1.8	1	gi|768955174|ref|XP_011616256.1|	BAR-PH-PTB	APPL1
2.2e-07	30	0.1	3.6e-06	26	0	2.1	2	gi|410916527|ref|XP_003971738.1|	PTB-CCM2	CCM2
8.7e-07	28	0.7	1.6e-06	27.2	0.7	1.4	1	gi|768944594|ref|XP_011611877.1|	PTB	SH2D5 (PARTIAL)
1.3e-06	27.4	0	2.4e-06	26.6	0	1.3	1	gi|410908393|ref|XP_003967675.1|	BAR-PH-PTB	APPL2
0.0011	17.9	0	0.0027	16.6	0	1.6	2	gi|768964309|ref|XP_011619985.1|	PTB-CCM2	CCM2L
---- inclusion threshold ------
0.41	9.5	0	0.66	8.8	0	1.2	1	gi|768909073|ref|XP_011602237.1|	PTB-SH3	EPS8L1
Fug IRS Domain Containing Proteins
E-value	score	bias	E-value	score	bias	exp	N	Sequence	Domain composition	Vertebrate/Human Homolog
------- ------ -----	------- ------ -----	---- --	--------	-----------
1.5e-35	121.3	0	2.6e-35	120.5	0	1.4	1	gi|768924185|ref|XP_011604907.1|	PH-IRS	DOK1
3.2e-31	107.4	0	6.5e-31	106.4	0	1.6	1	gi|768924255|ref|XP_011604934.1|	PH-IRS	IRS4
8.2e-31	106.1	0	1.5e-30	105.3	0	1.4	1	gi|768910003|ref|XP_011606169.1|	PH-IRS	IRS2
1.1e-30	105.7	0	1.9e-30	105	0	1.4	1	gi|768923121|ref|XP_011604448.1|	PH-IRS	IRS2-Like
1.3e-30	105.5	0	2.6e-30	104.5	0	1.5	1	gi|410917372|ref|XP_003972160.1|	IRS	DOK1
3e-30	104.3	0.1	4.9e-30	103.6	0.1	1.3	1	gi|768924397|ref|XP_011604992.1|	PH-IRS	IRS1
1e-29	102.6	0	2.1e-29	101.6	0	1.5	1	gi|410927956|ref|XP_003977406.1|	PH-IRS	DOK6
1.9e-29	101.7	0.1	4.2e-29	100.6	0.1	1.5	1	gi|768948770|ref|XP_011613589.1|	PH-IRS	DOK2
4e-29	100.7	0	6.8e-29	100	0	1.4	1	gi|768939928|ref|XP_011609960.1|	PH-IRS	IRS1-Like
1.2e-25	89.5	0.3	1.2e-25	89.5	0.3	2.1	2	gi|410919767|ref|XP_003973355.1|	IRS	FRS2
1.6e-25	89.2	0	2.8e-25	88.3	0	1.3	1	gi|768930367|ref|XP_011606023.1|	IRS	FRS2-Like
5.6e-22	77.8	0	9.3e-22	77	0	1.4	1	gi|768923471|ref|XP_011604601.1|	PH-IRS	IRS2
1.5e-08	34.7	0	2.9e-08	33.8	0	1.4	1	gi|768923123|ref|XP_011604449.1|	PH-IRS	IRS2-Like
1.6e-07	31.4	0	2.9e-07	30.5	0	1.4	1	gi|768943375|ref|XP_011611370.1|	PH-IRS	DOK7
2.5e-05	24.3	0	7.7e-05	22.8	0	1.8	1	gi|768924289|ref|XP_011604945.1|	PH-IRS	DOK7-Like
0.00031	20.8	0	0.00077	19.6	0	1.6	1	gi|410912160|ref|XP_003969558.1|	B41-IRS-ILWEQ	TLN2
0.00033	20.7	0	0.00087	19.4	0	1.7	1	gi|410903235|ref|XP_003965099.1|	B41-IRS-ILWEQ	TLN1
0.00062	19.9	0	0.0019	18.3	0	1.8	1	gi|410908012|ref|XP_003967485.1|	B41-IRS-ILWEQ	TLN2-Like

## Sheet: Callorhinchus milii
Elephant shark PTB Domain Containing Proteins
E-value	score	bias	E-value	score	bias	exp	N	Sequence	Domain composition	Vertebrate/Human Homolog
------- ------ -----	------- ------ -----	---- --	--------	------------------	-------------------
1.6e-69	233.5	0	5.9e-37	126.7	0	2.2	2	gi|632944164|ref|XP_007887349.1|	WW-PTB-PTB	APBB2
4.5e-67	225.4	0	4.4e-35	120.6	0	2.1	2	gi|632985966|ref|XP_007909978.1|	WW-PTB-PTB	APBB1
6e-66	221.7	0.1	4e-38	130.6	0	2.1	2	gi|632967732|ref|XP_007900143.1|	WW-PTB-PTB	APBB3
1.8e-59	200.5	0.6	2.2e-28	98.7	0.7	3.2	3	gi|632947202|ref|XP_007888934.1|	PTB-PTB-TBC	TBC1D4
4.5e-43	146.8	0.3	6.2e-43	146.3	0.3	1.1	1	gi|632945949|ref|XP_007888314.1|	PTB	GULP1
2e-41	141.4	0.1	3e-41	140.8	0.1	1.3	1	gi|632978450|ref|XP_007905922.1|	ANK-SAM-SAM-PTB	ANKS1B
4.1e-41	140.4	2.1	5.8e-41	139.8	2.1	1.2	1	gi|632990196|ref|XP_007884055.1|	SH3-PTB	MAPK8IP2
7.4e-41	139.5	0.6	1.1e-40	138.9	0.6	1.3	1	gi|632956212|ref|XP_007893847.1|	PTB	NOS1AP
1.8e-40	138.2	0.6	1.8e-40	138.2	0.6	2.9	2	gi|632964010|ref|XP_007898190.1|	PTB-SH2	SHC3
3.3e-40	137.4	0.1	5e-40	136.8	0.1	1.3	1	gi|632953270|ref|XP_007892325.1|	ANK-SAM-SAM-PTB	ANKS1A
1e-39	135.8	0.9	1.4e-39	135.3	0.9	1.2	1	gi|632941662|ref|XP_007885984.1|	SH3-PTB	MAPK8IP1
4.1e-39	133.8	1.7	6.9e-39	133	1.7	1.4	1	gi|632951669|ref|XP_007891427.1|	PTB-NUMBF	NUMB
1.8e-38	131.7	0	5e-38	130.2	0	1.7	1	gi|632962029|ref|XP_007897084.1|	PTB-SH2	SHC2
4.6e-36	123.8	0.6	1.8e-35	121.9	0.6	1.8	1	gi|632938306|ref|XP_007904516.1|	PTB-SH2	SHC4
6.6e-36	123.3	0.7	9.7e-36	122.7	0.7	1.2	1	gi|632969417|ref|XP_007901076.1|	PTB	NOS1APL
9.2e-36	122.8	0.1	1.2e-35	122.5	0.1	1.2	1	gi|632972145|ref|XP_007902516.1|	PTB	LDLRAP1
4.6e-35	120.5	0	6e-35	120.1	0	1.2	1	gi|632970083|ref|XP_007901450.1|	PTB	LDLRAP1B
1.1e-34	119.3	0	1.7e-34	118.6	0	1.3	1	gi|632984867|ref|XP_007909360.1|	PTEN_C2-SH2-PTB	TNS1
4.1e-33	114.1	1.3	4e-27	94.5	1	2.4	2	gi|632944051|ref|XP_007887288.1|	PTB-TBC	TBC1D1
1e-31	109.6	0	1.3e-31	109.2	0	1.2	1	gi|632988951|ref|XP_007883386.1|	PTB	DAB1
1.1e-30	106.2	0.2	1.9e-30	105.4	0.2	1.4	1	gi|632959556|ref|XP_007895688.1|	C1-PTEN_C2-SH2-PTB	TNS3
1.1e-30	106.1	0	1.5e-30	105.7	0	1.2	1	gi|632978943|ref|XP_007906192.1|	PTB-PDZ-PDZ	APBA3
1.8e-30	105.4	0	3.6e-30	104.5	0	1.5	1	gi|632950683|ref|XP_007890857.1|	PTB-PDZ-PDZ	APBA1
6.1e-29	100.5	0	8.9e-29	99.9	0	1.3	1	gi|632938962|ref|XP_007907080.1|	PTB-PDZ-PDZ	APBA2
1.1e-27	96.4	0.3	2.9e-27	95	0.3	1.7	2	gi|632980796|ref|XP_007907235.1|	PTB-TBC	RABGAP1
2.8e-25	88.4	0.1	3.8e-25	88	0.1	1.2	1	gi|632988279|ref|XP_007883021.1|	PTB	DAB2
7.3e-25	87.1	0.1	1.2e-24	86.4	0.1	1.3	1	gi|632974081|ref|XP_007903474.1|	PDZ-PTB-RGS-RBD-RBD	RGS12
8.6e-24	83.6	0.1	1.3e-23	83	0.1	1.3	1	gi|632971761|ref|XP_007902331.1|	PTB-SH3	EPS8
3.9e-22	78.1	0.3	2.4e-21	75.5	0.2	1.9	2	gi|632988670|ref|XP_007883237.1|	PTB-NUMBF	NUMBL
6.4e-20	70.9	0	1e-19	70.3	0	1.2	1	gi|632983559|ref|XP_007908707.1|	PTB	GULP1L
1.8e-19	69.4	0.2	3.1e-19	68.7	0.2	1.3	1	gi|632969518|ref|XP_007901128.1|	PTB-TBC	RABGAP1L
2.2e-16	59.3	0.2	1.8e-15	56.3	0.2	1.9	1	gi|632988315|ref|XP_007883042.1|	PTB	TNS2 (PARTIAL)
3.7e-16	58.6	0	1e-15	57.1	0	1.7	1	gi|632976214|ref|XP_007904670.1|	PTB	ITGB1BP1
7.6e-16	57.6	0	1.6e-15	56.5	0	1.5	1	gi|632966812|ref|XP_007899627.1|	SH2-PTB	TNS4
1.3e-14	53.5	0.3	2.2e-14	52.8	0.3	1.4	1	gi|632946788|ref|XP_007888731.1|	BAR-PH-PTB	APPL1
1.8e-13	49.8	0.2	1.7e-12	46.6	0.2	2	1	gi|632960309|ref|XP_007896119.1|	PTB	FAM43B
3.2e-13	49	0.5	6.7e-13	47.9	0.5	1.5	1	gi|632941035|ref|XP_007885653.1|	PTB-SH3	EPS8L2
1.6e-10	40.1	1.2	2.6e-10	39.4	1.2	1.4	1	gi|632933895|ref|XP_007892150.1|	PTB	PID1
1.5e-08	33.6	0.1	1.3e-05	24	0	2.2	2	gi|632972417|ref|XP_007902648.1|	PTB-CCM2	CCM2
2.5e-08	32.9	0	7e-08	31.5	0	1.8	1	gi|632982289|ref|XP_007908055.1|	PTB-SH3	EPS8L1
2.3e-07	29.7	0.3	3.4e-07	29.2	0.3	1.2	1	gi|632960084|ref|XP_007895994.1|	PTB-SH2	SH2D5
1e-06	27.6	0.1	1.8e-06	26.8	0.1	1.3	1	gi|632981966|ref|XP_007907878.1|	BAR-PH-PTB	APPL2
1e-05	24.4	0.1	1.7e-05	23.6	0.1	1.3	1	gi|632943456|ref|XP_007886958.1|	RUN-PDZ-PTB	Novel VERTEBRATE NOT HUMAN
4e-05	22.4	0.1	8.1e-05	21.4	0.1	1.4	1	gi|632963286|ref|XP_007897795.1|	PTB-SH3	EPS8L3
0.0035	16	0	0.011	14.4	0	1.8	1	gi|632939799|ref|XP_007883191.1|	PTB-CCM2	CCM2L
Elephant shark IRS Domain Containing Proteins
E-value	score	bias	E-value	score	bias	exp	N	Sequence	Domain composition	Vertebrate/Human Homolog
------- ------ -----	------- ------ -----	---- --	--------	-----------	-----------
5.6e-34	116.1	0.1	1.1e-33	115.1	0.1	1.5	1	gi|632976559|ref|XP_007904862.1|	PH-IRS	DOK1
6.4e-32	109.5	0	1.1e-31	108.7	0	1.4	1	gi|632933964|ref|XP_007894596.1|	PH-IRS	IRS1
3e-31	107.3	0.2	5.5e-31	106.5	0.2	1.4	1	gi|632988767|ref|XP_007883289.1|	PH-IRS	DOK2
1.7e-30	104.9	0.1	4.1e-30	103.7	0	1.7	2	gi|632939485|ref|XP_007910241.1|	PH-IRS	DOK5
7.2e-30	102.9	0	1.5e-29	101.8	0	1.6	1	gi|632936251|ref|XP_007893174.1|	PH-IRS	IRS4
1.9e-29	101.5	0.1	3.8e-29	100.6	0.1	1.5	1	gi|632952161|ref|XP_007891696.1|	PH-IRS	IRS2
1.9e-28	98.3	0	4e-28	97.3	0	1.5	1	gi|632982334|ref|XP_007908080.1|	PH-IRS	DOK3
3.6e-27	94.2	0	8.1e-27	93.1	0	1.5	1	gi|632981000|ref|XP_007907349.1|	PH-IRS	DOK3-LIKE
4.6e-26	90.7	0.1	1.2e-25	89.3	0	1.7	2	gi|632963135|ref|XP_007897712.1|	IRS	FRS2
6.8e-06	26	0	2e-05	24.4	0	1.8	2	gi|632974083|ref|XP_007903475.1|	PH-IRS	DOK7
0.00011	22.1	0	0.0003	20.7	0	1.7	1	gi|632958988|ref|XP_007895362.1|	B41-IRS-ILWEQ	TLN1
0.0017	18.2	0	0.0049	16.8	0	1.8	1	gi|632938640|ref|XP_007905815.1|	B41-IRS-ILWEQ	TLN2
---- inclusion threshold ------

## Sheet: Petromyzon marinus
Sea Lamprey PTB Domain Containing Proteins
E-value	score	bias	E-value	score	bias	exp	N	Sequence	Domain composition	Vertebrate/Human Homolog
------- ------ -----	------- ------ -----	---- --	--------	-----------	-----------
5.5e-59	198.1	1.4	1.2e-29	102	0.1	2.3	2	ENSPMAP00000008840.1	WW-PTB-PTB	APBB2
2.3e-42	143.7	1.4	2.9e-42	143.3	1.4	1.1	1	ENSPMAP00000001559.1	PTB	GULP1
4.9e-38	129.5	0.4	6.7e-38	129	0.4	1.2	1	ENSPMAP00000007152.1	SH3-PTB	MAPK8IP1
1.5e-36	124.6	0.1	2.3e-36	124	0.1	1.2	1	ENSPMAP00000007056.1	ANK-SAM-SAM-PTB	ANKS1B
2.1e-34	117.5	0.5	3.2e-34	116.9	0.5	1.2	1	ENSPMAP00000001971.1	PTB-NUMBF	NUMB
1.2e-32	111.7	0	2.2e-32	111	0	1.4	1	ENSPMAP00000010600.1	PTEN_C2-SH2-PTB	TNS1
3.7e-32	110.2	0	4.9e-32	109.8	0	1.1	1	ENSPMAP00000005718.1	SH2-PTB	TNS1-Like
2.4e-31	107.5	0	3.5e-31	107	0	1.3	1	ENSPMAP00000002752.1	PTB-PDZ-PDZ	APBA1
1.1e-30	105.4	2.1	1.7e-30	104.8	2.1	1.2	1	ENSPMAP00000006450.1	PTB-NUMBF	NUMBL
1.4e-29	101.7	0	2.1e-29	101.2	0	1.3	1	ENSPMAP00000003637.1	SH2-PTB	TNS1-Like
1.2e-23	82.4	0.2	1.4e-23	82	0.2	1.1	1	ENSPMAP00000001970.1	PTB	DAB2
8.7e-18	63.1	0.1	1.5e-17	62.4	0.1	1.4	1	ENSPMAP00000001948.1	SH2-PTB	TNS1-Like
1.2e-17	62.6	0.8	2e-17	62	0.8	1.3	1	ENSPMAP00000002145.1	PTB-NUMBF	NUMBL-Like
1.4e-16	59.2	1.4	1.7e-16	58.9	1.4	1.1	1	ENSPMAP00000003290.1	PTB	APBB1
2.1e-14	52	0	3.2e-14	51.4	0	1.2	1	ENSPMAP00000007383.1	PTB-SH3	EPS8
2.9e-11	41.7	0	4.7e-11	41	0	1.2	1	ENSPMAP00000010589.1	PTB-SH3 (poor)	EPS8-Like
5.8e-11	40.7	0.2	1.2e-10	39.7	0.1	1.5	2	ENSPMAP00000004135.1	BAR-PH-PTB	APPL1
1.1e-10	39.8	0.1	1.2e-10	39.7	0.1	1	1	ENSPMAP00000008177.1	PTB (PARTIAL)	GULP1-Like
3.8e-06	25	0.2	0.00014	19.8	0.1	2.1	2	ENSPMAP00000007480.1	PTB	ITGB1BP1
8.4e-06	23.8	0.2	1.6e-05	23	0.2	1.4	1	ENSPMAP00000007273.1	PDZ-PTB-RGS-RBD-RBD	RGS12
0.00029	18.8	0.1	0.49	8.2	0	2.6	2	ENSPMAP00000001048.1	PTB-CCM2	CCM2
0.0018	16.2	0.1	0.0024	15.8	0.1	1.2	1	ENSPMAP00000003730.1	PTB (PARTIAL)	GULP1-Like
0.0073	14.2	0	0.095	10.5	0	2.1	2	ENSPMAP00000006451.1	PTB	EPS8-Like
Sea Lamprey IRS Domain Containing Proteins
E-value	score	bias	E-value	score	bias	exp	N	Sequence	Domain composition	Vertebrate/Human Homolog
------- ------ -----	------- ------ -----	---- --	--------	-----------	-----------
9.4e-32	108.3	0	1.6e-31	107.6	0	1.3	1	ENSPMAP00000010550.1	IRS	DOK1
4.4e-30	102.9	0.1	7.4e-30	102.2	0.1	1.4	1	ENSPMAP00000003476.1	PH-IRS	IRS1
5.8e-28	96.1	0	9.5e-28	95.4	0	1.3	1	ENSPMAP00000007081.1	IRS	DOK6
6.5e-27	92.7	0.4	4.1e-26	90.1	0.1	2.1	2	ENSPMAP00000004437.1	IRS	FRS2
2.1e-26	91.1	0	3.2e-26	90.5	0	1.2	1	ENSPMAP00000005104.1	IRS	DOK6-like
1.3e-05	24.4	0	3e-05	23.2	0	1.6	1	ENSPMAP00000003760.1	B41-IRS	TLN2
3.7e-05	22.9	0	0.0001	21.5	0	1.7	1	ENSPMAP00000007718.1	IRS-ILWEQ	TLN1

## Sheet: Ciona intestinalis
Ciona PTB Domain Containing Proteins
E-value	score	bias	E-value	score	bias	exp	N	Sequence	Domain composition	Vertebrate/Human Homolog
------- ------ -----	------- ------ -----	---- --	--------	-----------
1.1e-35	122.3	1.3	1.5e-35	121.9	1.3	1.2	1	gi|699239984|ref|XP_009857875.1|	PTB	NUMB
2.6e-34	117.8	0.3	4.1e-34	117.1	0.3	1.3	1	gi|198422825|ref|XP_002130127.1|	PTB	NOS1AP
1.3e-33	115.5	0.1	1.6e-33	115.2	0.1	1.1	1	gi|699242391|ref|XP_009858595.1|	PTB	ANKS1B
4.6e-33	113.7	0.2	6.4e-33	113.2	0.2	1.2	1	gi|459183356|ref|XP_002119798.2|	PTB	GULP1
4.7e-33	113.7	0	6.7e-33	113.1	0	1.2	1	gi|198429103|ref|XP_002127122.1|	PTB	DAB2
2.3e-32	111.4	0.1	3.4e-25	87.9	0	2.1	2	gi|198437274|ref|XP_002130925.1|	PTB-SH2	SHC1
9.5e-28	96.3	3.7	4.7e-27	94	3.7	2	1	gi|198416004|ref|XP_002128105.1|	SH3-PTB	MAPK8IP1
1.3e-25	89.2	0	2.1e-25	88.6	0	1.3	1	gi|74096279|ref|NP_001027625.1|	SH2-PTB	TNS1
4.1e-22	77.8	0	7.9e-22	76.9	0	1.5	1	gi|198423672|ref|XP_002130059.1|	PTB-PRZ-PDZ	APBA1
1.6e-20	72.6	0.2	5.4e-20	70.9	0.1	1.8	2	gi|459176660|ref|XP_004226107.1|	PTB	APBB2
2.8e-15	55.4	0	4.3e-15	54.8	0	1.3	1	gi|699254975|ref|XP_009861566.1|	PTB-SH3	EPS8
2.9e-13	48.8	5.7	1.5e-08	33.4	6.2	3.2	3	gi|459173602|ref|XP_002123220.2|	PTB-TBC	TBC1D4
3.1e-13	48.7	0.1	5e-13	48	0.1	1.3	1	gi|198411970|ref|XP_002127484.1|	PDZ-PTB (PARTIAL)	RGS12
6.2e-13	47.7	1	2.4e-12	45.8	1	1.9	1	gi|198427983|ref|XP_002131287.1|	PTB-TBC	RABGAP1
1.8e-08	33.1	0	3.3e-08	32.3	0	1.4	1	gi|198431177|ref|XP_002122911.1|	PTB-CCM2	CCM2
0.00061	18.3	0.1	0.0028	16.1	0	1.9	2	gi|699251574|ref|XP_002122559.2|	BAR-PH-PTB	APPL2
0.002	16.6	0.2	0.014	13.8	0.2	2.1	2	gi|74096195|ref|NP_001027606.1|	PTB	FAM43B
---- inclusion threshold ------
0.034	12.5	0.1	0.048	12.1	0.1	1.2	1	gi|198431179|ref|XP_002122540.1|	PTB	ITGB1BP1
Ciona IRS Domain Containing Proteins
E-value	score	bias	E-value	score	bias	exp	N	Sequence	Domain composition	Vertebrate/Human Homolog
------- ------ -----	------- ------ -----	---- --	--------	-----------
4.8e-28	96.6	0	8.1e-28	95.9	0	1.3	1	gi|198435906|ref|XP_002130339.1|	PH-IRS	DOK5
1.2e-17	63.2	0	2.5e-17	62.2	0	1.5	1	gi|198413343|ref|XP_002128395.1|	PH-IRS	IRS1
2.2e-15	55.9	0	4.1e-15	55.1	0	1.4	1	gi|198431013|ref|XP_002121024.1|	IRS	FRS3
0.00016	21.1	0	0.0005	19.5	0	1.8	1	gi|699240361|ref|XP_009857994.1|	B41-IRS-ILWEQ	TLN2

[truncated: 20 more sheets: Oikopleura dioica, Branchiostoma floridae, Saccoglossus kowalevskii, Strongylocentrotus purpuratus, Lottia gigantea, Capitella telata, Drosophila melanogaster, Caenorhabditis elegans, Hydra Vulgaris, Nematostella vectensis, Trichoplax adhaerens, Amphimedon queenslandica, Oscarella carmela, Xestospongia testudinaria, Stylissa carteri, Mnemiopsis leidyi, Pleurobrachia bachei, Monosiga brevicollis, Salpingoeca rosetta, Dictyostelium discoideum AX4]
