# Supplementary material
Source: publisher figshare collection journal article supplement (https://gsajournals.figshare.com/articles/dataset/_/8427110)
Supplement: Supplementary file 4 [file 1]

A

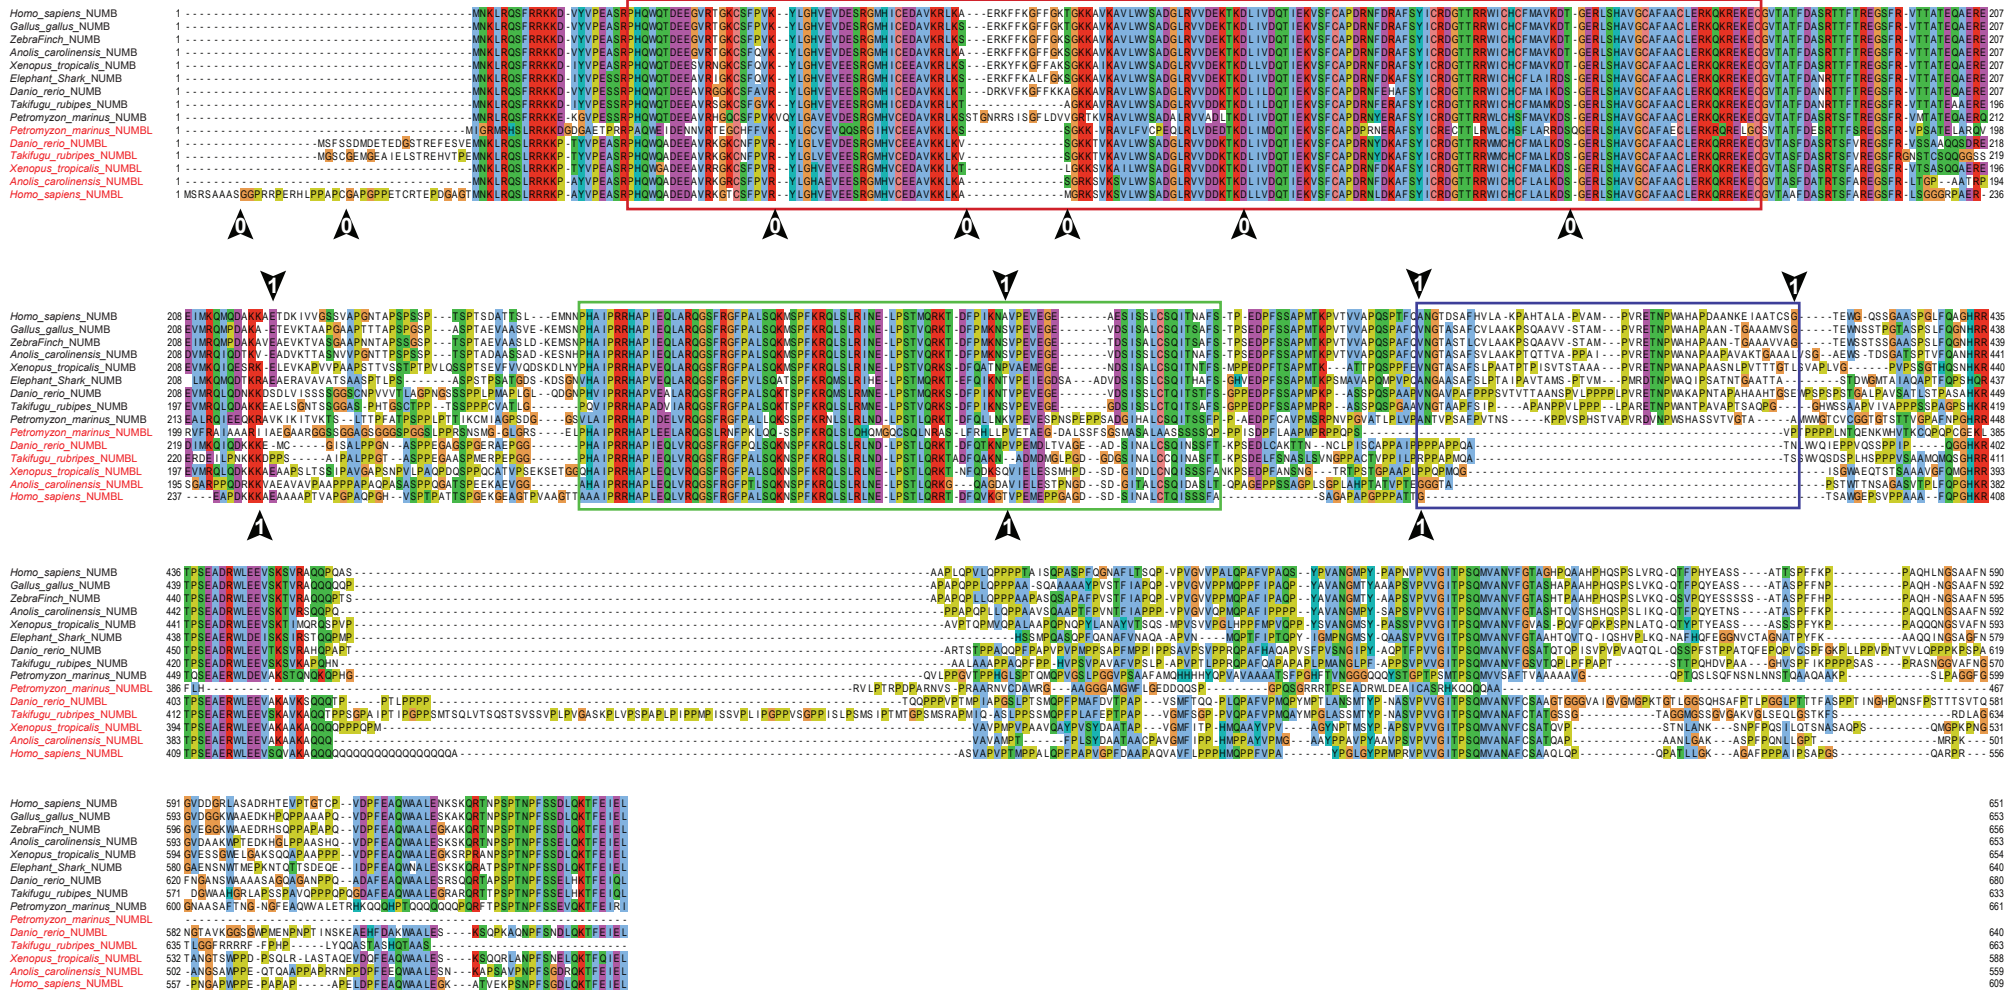

B

| NUMB LOCI                                       | Gene Length | CODING EXON NUMBERS AND LENGTH |    |      |    |     |     |      |     |     |      |
|-------------------------------------------------|-------------|--------------------------------|----|------|----|-----|-----|------|-----|-----|------|
|                                                 |             | 1                              | 2  | 3    | 4  | 5   | 6   | 7    | 8   | 9   | 10   |
| <i>Homo sapiens</i>                             | 79171       | 126                            | 75 | 33   | 75 | 141 | 205 | 294  | 147 | 144 | 713  |
| <i>Anolis carolinensis</i> (Lizard)             | 35116       | 126                            | 75 | 33   | 75 | 141 | 202 | 300  | 150 | 156 | 686  |
| <i>Danio rerio</i> (Zebrafish)                  | 27484       | 126                            | 75 | 33   | 75 | 141 | 205 | 306  | 144 | 153 | 671  |
| <i>Takifugu rubripes</i> (1)                    | 9931        | 126                            | 75 | N.A. | 75 | 141 | 205 | 285  | 144 | 132 | 719  |
| <i>Xenopus tropicalis</i> (Western clawed frog) | 23736       | 126                            | 75 | 33   | 75 | 141 | 205 | 309  | 141 | 171 | 782  |
| <i>Callorhinchus milii</i> (Elephant shark)     | 36155       | 126                            | 75 | 33   | 75 | 141 | 205 | 288  | 162 | 144 | 760  |
| <i>Petromyzon marinus</i> (Lamprey) (2)         | 18723       | 126                            | 75 | 54   | 75 | 141 | 208 | 111* | 200 | 162 | 760* |
| <i>Gallus gallus</i> (Chicken)                  | 35474       | 126                            | 75 | 33   | 75 | 141 | 202 | 300  | 150 | 144 | 701  |
| <i>Taeniopygia guttata</i> (Zebra finch)        | 41770       | 126                            | 75 | 33   | 75 | 141 | 202 | 303  | 150 | 144 | 720  |

  

| NUMBL LOCI                                      | Gene Length | 1  | 2   | 3   | 4  | N.P. | 5  | 6   | 7   | 8    | 9   | N.P. | 10  | 11  |
|-------------------------------------------------|-------------|----|-----|-----|----|------|----|-----|-----|------|-----|------|-----|-----|
|                                                 |             |    |     |     |    |      |    |     |     |      |     |      |     |     |
| <i>Homo sapiens</i>                             | 19549       | 24 | 85  | 140 | 75 |      | 75 | 141 | 190 | 306  | 123 |      | 668 |     |
| <i>Anolis carolinensis</i> (Lizard)             | 7821        |    | 126 | 75  |    |      | 75 | 141 | 199 | 287* | 172 |      | 602 |     |
| <i>Danio rerio</i> (Zebrafish)                  | 19513       |    | 39  | 153 | 75 |      | 75 | 141 | 205 | 267  | 177 |      | 788 |     |
| <i>Takifugu rubripes</i>                        | 12876       |    | 39  | 153 | 75 |      | 75 | 141 | 208 | 273  | 180 |      | 857 |     |
| <i>Xenopus tropicalis</i> (Western clawed frog) | 9037        |    |     | 126 | 75 |      | 75 | 141 | 205 | 312  | 174 |      | 656 |     |
| <i>Petromyzon marinus</i> (Lamprey)             | 8183        |    |     | 132 | 75 |      | 72 | 141 | 202 | 317  | 142 |      | 55  | 292 |

Figure S3
