# Supplementary material
Source: publisher figshare collection journal article supplement (https://gsajournals.figshare.com/articles/dataset/_/8427110)
Supplement: Supplementary file 6 [file 1]

A

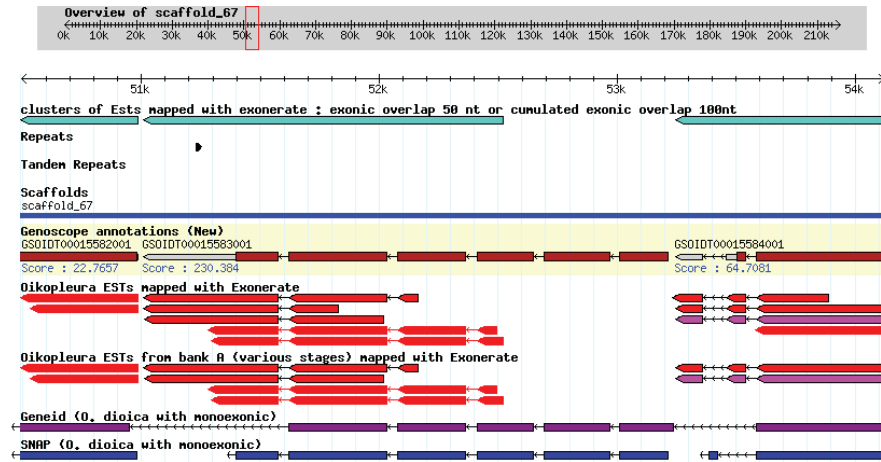

B

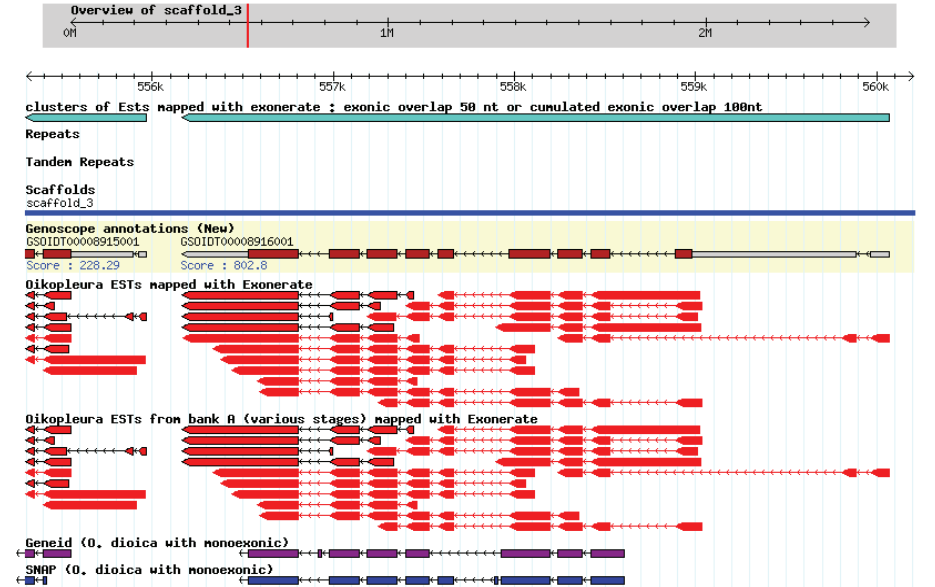

C

|                             |     |                                                                                        |     |
|-----------------------------|-----|----------------------------------------------------------------------------------------|-----|
| Homo_sapiens_NUMB           | 1   | -----MNKLRSERFRK-----DYYVPEASRPHQWQT--                                                 | 27  |
| Homo_sapiens_NUMBL          | 1   | -----MSRSAASGGPRRPERHLPAPCGAPGPETCRTEPDGAGTMNKLRSRRLRRK-----PAYVPEASRPHQWQA--          | 68  |
| Oikopleura_dioica_NUMB      | 1   | -----MSLLHDDRQDGHSHHNASFSRSGLLKSIRKSRFRKSKPPALADAKRVEWLD--                             | 55  |
| Oikopleura_dioica_NUMB-Like | 1   | MKKFRLSFRKKEKKEYINEIEDNEENENDGLSRAKNRTISSAMPAAQNFRVRTIRNSFRKSKKHDLTOKDFETDQENELDNQV    | 83  |
| Homo_sapiens_NUMB           | 28  | -----DEEGVRTGKCSFPVKYLGHVEVDESQGMHICEDAVKRLKAERKFFKGFFGKTGKKAVKAVLWVSADGLR             | 96  |
| Homo_sapiens_NUMBL          | 69  | -----DEDAVRKGTCSFPVRYLGHVEVESRGMHVCEDAVKLLKAM-----GRKS VKSVLWVSADGLR                   | 126 |
| Oikopleura_dioica_NUMB      | 56  | -----DERKVNDDTCEFRVKYLGAEVAEPRGIIHCEEA VKRKLRR-----QRNKPRAVLVI SPDAVR                  | 114 |
| Oikopleura_dioica_NUMB-Like | 84  | PRDPKQTIKSDANNEFNKSGIANYCKFLGKKEVGGKSGISYTEALTYKKAIR-----AKKKPRV I IQVSPEVIR           | 156 |
| Homo_sapiens_NUMB           | 97  | VVDEKTKDLIVDGTIEKVSFCAPDRNDFRAFSYICRDGTTRRWIHCFLMAVKDT-GERLSHAVGCFAACLERKQKREKECGV     | 178 |
| Homo_sapiens_NUMBL          | 127 | VVDDKTKDLLVDGTIEKVSFCAPDRNLDKAFSYICRDGTTRRWIHCFLALKDS-GERLSHAVGCFAACLERKQKREKECGV      | 208 |
| Oikopleura_dioica_NUMB      | 115 | LVKESKQLILDQSEIKISFCAPDSITYEAASFYICRDGTIKRWGYSFSSITKE-GERLSNAFSGAFKAGFEKK-----         | 188 |
| Oikopleura_dioica_NUMB-Like | 157 | VMSANDQSLLFQGAVDKISFCARSNTHQDAFSYIARDGTSQAIMGYCESAKNBITGASLSKVFGVAFKACLDNRNRLHKEAGK    | 239 |
| Homo_sapiens_NUMB           | 179 | T-----ATFDASRTTETREGSFRVTTATEQAEREEIMKQMQDAKKAETDKIVVGSSVAPGNTAPSPS--SPTSPTS DATTSLE   | 255 |
| Homo_sapiens_NUMBL          | 209 | T-----AAFADASRTSEAREGSFRLSGGGRPAEREAPDKKKAEEAAAPT---VAPGPAQPGHVSRTPTATSPGKEGEGATPVAA   | 284 |
| Oikopleura_dioica_NUMB      | 189 | -----SLQEAENKIREETSFMSEQPIITKTKTTPS-----VKTPRSDPGYCEPPKS---DDRESSKEEPPKIN              | 248 |
| Oikopleura_dioica_NUMB-Like | 240 | APVDVEVTDLPQGGETROGTERHRKPKKQEQEVTES-----LIQIDTVEASSLSNG-TSFNSTPMTSPDSQPS              | 307 |
| Homo_sapiens_NUMB           | 256 | GNPHATPRRHAFIEOLARQGSFRGFPALSQKMSPFKRQLSLRINELPSTMORKTDFPIKNAVPEVE---GEAESISSLCSQI     | 334 |
| Homo_sapiens_NUMBL          | 285 | TTAAAI PRRHAPLEOLVROGSFRGFPALSQKNSPFKRQLSLRLNELPSTLQRRDFQVKGTVPMEPPGAGSDSINALCTQI      | 367 |
| Oikopleura_dioica_NUMB      | 249 | FEIKSLRPQCAP-EEIKRQPSFKLVPVNAKN---AFKTSLSREDKLQINIEKFRGHQVLNPVPEIESESRRKPVQAQVQFRRN    | 327 |
| Oikopleura_dioica_NUMB-Like | 308 | VSNDLIRARPAASADLVROASLRIPLNKNSQAQPFKKSVMAYSNPNKPTTEAAKNWT-----DQLEAIKRLNIEV            | 379 |
| Homo_sapiens_NUMB           | 335 | TNAFSTPEDFFSSAPMTKPVTIVVAPQSPFTQANGTDSAFHVLAKPAHTALAPVAMPVRETNPWAHAPDAANKEI AATCSGTE   | 417 |
| Homo_sapiens_NUMBL          | 368 | SSSFASAGAP-----APGPP-----PATGTGSA                                                      | 391 |
| Oikopleura_dioica_NUMB      | 328 | YNSQS IQVMR-----TSSKPT                                                                 | 344 |
| Oikopleura_dioica_NUMB-Like | 380 | HNAKP VHDGP-----                                                                       | 389 |
| Homo_sapiens_NUMB           | 418 | GQSSGAASPGLFQAGHRRTPEADRWLEEVSKSVRAQQPQASAAPLQPVLPQPPPTAISQPASPFQGN AFLTSQPVPG---V     | 497 |
| Homo_sapiens_NUMBL          | 392 | GEPS-VPPAAAFQPGHKRTPSEAEWLVEVSQVAKAQQQQQQQQQQQQQQQQQAASVAPVPTMP-PALQPFAPVPGFD          | 472 |
| Oikopleura_dioica_NUMB      | 345 | QP I REDDPWSSVEEDKPKFFESAFATAPMPPAHEEPVADDTRSQTASTAGDRWIESISREVIPL LKTGESGSSVGI STPRLS | 427 |
| Oikopleura_dioica_NUMB-Like | 390 | -----AWEPADPFNELANRHTPKSPPIAIPSRAPQAPKQPFQGGISGVPARSLNSSNSS-----                       | 443 |
| Homo_sapiens_NUMB           | 498 | VPALQAPAFVP-----AQSYPVANGMPYF-APNVPVVGITPSQMVANVFGTAGHPQAAHPHQSPLVRQQTFFPHYEASSATTSP   | 574 |
| Homo_sapiens_NUMBL          | 473 | APAQVAVFLPPPHMQPPFVPAAYPLGYPPMPRPVVGITPSQMVANAFCSAAQLQ---PQATLLKGAGAFPPPAIPSA PGS-     | 551 |
| Oikopleura_dioica_NUMB      | 428 | QRGKTPPVIPARVGFNRFNPSYSSQRMFSSHSAPTGSGFTRSYSVR-----YTGSAGVSS TSS-                      | 484 |
| Oikopleura_dioica_NUMB-Like | 444 | -----PFAMDAPKSLYGNQFRQIM-----                                                          | 464 |
| Homo_sapiens_NUMB           | 575 | FFKPPAQHLNGSAAFNGVDDGRLASADRHTVEPTGTCPVDPFEAQWAALENKSKQRTNPSPTNPFSSDLQKTFEIEL          | 651 |
| Homo_sapiens_NUMBL          | 552 | -----QARPRNGAPWP-----PEPAPAPAPELDPEAQWAALEGKATVEK---PSNPFSGDLQKTFEIEL                  | 609 |
| Oikopleura_dioica_NUMB      | 485 | -----SPNPFQDAPFPDFSSQWEALGQKQAAS TLQSS TNEAKKSGPPFLS I--                               | 530 |
| Oikopleura_dioica_NUMB-Like |     | -----                                                                                  |     |

D

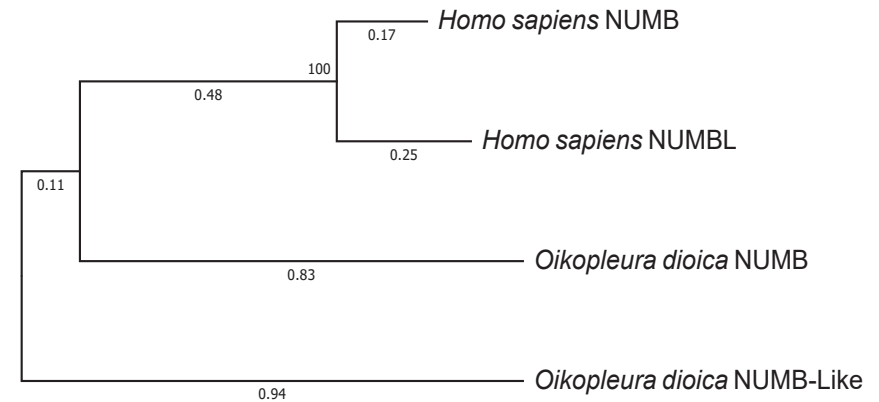

Figure S5
